# Supplementary material for: Impacts of Whole-Body Vibration on Muscle Strength, Power, and Endurance in Older Adults: A Systematic Review and Meta-Analysis
Source: MDPI journal article supplement (doi:10.3390/jcm12134467), 2023-07-03
Supplement: s1 [file s1]

## **Supplementary S1**

### **Search strategy in each database**

Note: To increase search sensitivity we left "all fields" in each search term.

**PubMed** search strategy (pubmed.gov, 1996 to 1, May 2022).

**#1:** whole body vibration

**#2:** WBV

**#3:** vibration

**#4:** vibration therapy

**#5:** vibration training

**#6:** oscillating platforms

**#7:** vibrating platform

**#8:** vibration device

**#9:** mechanical vibration

**#10:** #1 OR #2 OR #3 OR #4 OR #5 OR #6 OR #7 OR #8 OR #9

**#11:** aged [MeSH Terms]

**#12:** aging [MeSH Terms]

**#13:** ageing

**#14:** elderly

**#15:** older people

**#16:** older adults

**#17:** older adult

**#18:** older women

**#19:** older men

**#20:** geriatric

**#21:** geriatrics

**#22:** frail elderly [MeSH Terms]

**#23:** elder

**#24:** elders

**#25:** aged people

**#26:** #11 OR #12 OR #13 OR #14 OR #15 OR #16 OR #17 OR #18 OR #19 OR #20 OR 21  
OR #22 OR #23 OR #24 OR #25

**#27:** muscle strength [MeSH Terms]

**#28:** muscle strength dynamometer [MeSH Terms]

**#29:** strengthening

**#30:** strength

**#31:** torque [MeSH Terms]

**#32:** maximal voluntary contraction

**#33:** 1RM

**#34:** one repetition maximum

**#35:** 1 repetition maximum

**#36:** muscular endurance

**#37:** muscle endurance

**#38:** isometric

**#39:** isometry

**#40:** muscle power

**#41:** power

**#42:** muscular power

**#43:** power output

**#44:** functional tests  
**#45:** functional autonomy  
**#46:** functional mobility  
**#47:** #27 OR #28 OR #29 OR #30 OR #31 OR #32 OR #33 OR #34 OR #35 OR #36 OR #37 OR #38 OR #39 OR #40 OR #41 OR #42 OR #43 OR #44 OR #45 OR #46  
**#48:** #10 AND #26 AND #47

**Embase** (embase.com, 1947 to 1, May 2022)

**#1:** whole body vibration/exp  
**#2:** WBV  
**#3:** vibration/exp  
**#4:** vibration therapy/exp  
**#5:** vibration training  
**#6:** oscillating platforms  
**#7:** vibrating platform  
**#8:** vibration device  
**#9:** mechanical vibration/exp  
**#10:** #1 OR #2 OR #3 OR #4 OR #5 OR #6 OR #7 OR #8 OR #9  
**#11:** aged/exp  
**#12:** aging/exp  
**#13:** ageing/exp  
**#14:** elderly/exp  
**#15:** older people/exp  
**#16:** older adults/exp  
**#17:** older adult/exp  
**#18:** older women  
**#19:** older men  
**#20:** geriatric/exp  
**#21:** geriatrics/exp  
**#22:** frail elderly/exp  
**#23:** elder  
**#24:** elders  
**#25:** aged people/exp  
**#26:** #11 OR #12 OR #13 OR #14 OR #15 OR #16 OR #17 OR #18 OR #19 OR #20 OR 21 OR #22 OR #23 OR #24 OR #25  
**#27:** muscle strength/exp  
**#28:** muscle strength dynamometer/exp  
**#29:** strengthening  
**#30:** strength/exp  
**#31:** torque/exp  
**#32:** maximal voluntary contraction/exp  
**#33:** 1RM  
**#34:** one repetition maximum/exp  
**#35:** 1 repetition maximum  
**#36:** muscular endurance/exp  
**#37:** muscle endurance/exp  
**#38:** isometric  
**#39:** isometry  
**#40:** muscle power/exp  
**#41:** power/exp  
**#42:** muscular power/exp

**#43:** power output/exp  
**#44:** functional tests  
**#45:** functional autonomy  
**#46:** functional mobility/exp  
**#47:** #27 OR #28 OR #29 OR #30 OR #31 OR #32 OR #33 OR #34 OR #35 OR #36 OR #37 OR #38 OR #39 OR #40 OR #41 OR #42 OR #43 OR #44 OR #45 OR #46  
**#48:** #10 AND #26 AND #47

**CENTRAL** (cochranelibrary.com, 1998 to 1, May 2022)

**#1:** whole body vibration  
**#2:** WBV  
**#3:** vibration  
**#4:** vibration therapy  
**#5:** vibration training  
**#6:** oscillating platforms  
**#7:** vibrating platform  
**#8:** vibration device  
**#9:** mechanical vibration  
**#10:** #1 OR #2 OR #3 OR #4 OR #5 OR #6 OR #7 OR #8 OR #9  
**#11:** aged  
**#12:** aging  
**#13:** ageing  
**#14:** elderly  
**#15:** older people  
**#16:** older adults  
**#17:** older adult  
**#18:** older women  
**#19:** older men  
**#20:** geriatric  
**#21:** geriatrics  
**#22:** frail elderly  
**#23:** elder  
**#24:** elders  
**#25:** aged people  
**#26:** #11 OR #12 OR #13 OR #14 OR #15 OR #16 OR #17 OR #18 OR #19 OR #20 OR 21 OR #22 OR #23 OR #24 OR #25  
**#27:** muscle strength  
**#28:** muscle strength dynamometer  
**#29:** strengthening  
**#30:** strength  
**#31:** torque  
**#32:** maximal voluntary contraction  
**#33:** 1RM  
**#34:** one repetition maximum  
**#35:** 1 repetition maximum  
**#36:** muscular endurance  
**#37:** muscle endurance  
**#38:** isometric  
**#39:** isometry  
**#40:** muscle power  
**#41:** power

**#42:** muscular power  
**#43:** power output  
**#44:** functional tests  
**#45:** functional autonomy  
**#46:** functional mobility  
**#47:** #27 OR #28 OR #29 OR #30 OR #31 OR #32 OR #33 OR #34 OR #35 OR #36 OR  
 #37 OR #38 OR #39 OR #40 OR #41 OR #42 OR #43 OR #44 OR #45 OR #46  
**#48:** #10 AND #26 AND #47 in Trials

**CINAHL** (via EBSCOhost, 1937 to 1, May 2022)

**S1:** whole body vibration  
**S2:** WBV  
**S3:** vibration  
**S4:** vibration therapy  
**S5:** vibration training  
**S6:** oscillating platforms  
**S7:** vibrating platform  
**S8:** vibration device  
**S9:** mechanical vibration  
**S10:** S1 OR S2 OR S3 OR S4 OR S5 OR S6 OR S7 OR S8 OR S9  
**S11:** aged  
**S12:** aging  
**S13:** ageing  
**S14:** elderly  
**S15:** older people  
**S16:** older adults  
**S17:** older adult  
**S18:** older women  
**S19:** older men  
**S20:** geriatric  
**S21:** geriatrics  
**S22:** frail elderly  
**S23:** elder  
**S24:** elders  
**S25:** aged people  
**S26:** S11 OR S12 OR S13 OR S14 OR S15 OR S16 OR S17 OR S18 OR S19 OR S20 OR  
 21 OR S22 OR S23 OR S24 OR S25  
**S27:** muscle strength  
**S28:** muscle strength dynamometer  
**S29:** strengthening  
**S30:** strength  
**S31:** torque  
**S32:** maximal voluntary contraction  
**S33:** 1RM  
**S34:** one repetition maximum  
**S35:** 1 repetition maximum  
**S36:** muscular endurance  
**S37:** muscle endurance  
**S38:** isometric  
**S39:** isometry  
**S40:** muscle power

**S41:** power  
**S42:** muscular power  
**S43:** power output  
**S44:** functional tests  
**S45:** functional autonomy  
**S46:** functional mobility  
**S47:** S27 OR S28 OR S29 OR S30 OR S31 OR S32 OR S33 OR S34 OR S35 OR S36 OR S37 OR S38 OR S39 OR S40 OR S41 OR S42 OR S43 OR S44 OR S45 OR S46  
**S48:** S10 AND S26 AND S47

**Web of Science** (webofscience.com, 1900 to 1, May 2022)

**1:** whole body vibration  
**2:** WBV  
**3:** vibration  
**4:** vibration therapy  
**5:** vibration training  
**6:** oscillating platforms  
**7:** vibrating platform  
**8:** vibration device  
**9:** mechanical vibration  
**10:** #1 OR #2 OR #3 OR #4 OR #5 OR #6 OR #7 OR #8 OR #9  
**11:** aged  
**12:** aging  
**13:** ageing  
**14:** elderly  
**15:** older people  
**16:** older adults  
**17:** older adult  
**18:** older women  
**19:** older men  
**20:** geriatric  
**21:** geriatrics  
**22:** frail elderly  
**23:** elder  
**24:** elders  
**25:** aged people  
**26:** #11 OR #12 OR #13 OR #14 OR #15 OR #16 OR #17 OR #18 OR #19 OR #20 OR 21 OR #22 OR #23 OR #24 OR #25  
**27:** muscle strength  
**28:** muscle strength dynamometer  
**29:** strengthening  
**30:** strength  
**31:** torque  
**32:** maximal voluntary contraction  
**33:** 1RM  
**34:** one repetition maximum  
**35:** 1 repetition maximum  
**36:** muscular endurance  
**37:** muscle endurance  
**38:** isometric  
**39:** isometry

**40:** muscle power  
**41:** power  
**42:** muscular power  
**43:** power output  
**44:** functional tests  
**45:** functional autonomy  
**46:** functional mobility  
**47:** #27 OR #28 OR #29 OR #30 OR #31 OR #32 OR #33 OR #34 OR #35 OR #36 OR #37  
 OR #38 OR #39 OR #40 OR #41 OR #42 OR #43 OR #44 OR #45 OR #46  
**48:** #10 AND #26 AND #47

**SPORTDiscus** (via EBSCOhost, 1985 to 1, May 2022)

**S1:** whole body vibration  
**S2:** WBV  
**S3:** vibration  
**S4:** vibration therapy  
**S5:** vibration training  
**S6:** oscillating platforms  
**S7:** vibrating platform  
**S8:** vibration device  
**S9:** mechanical vibration  
**S10:** S1 OR S2 OR S3 OR S4 OR S5 OR S6 OR S7 OR S8 OR S9  
**S11:** aged  
**S12:** aging  
**S13:** ageing  
**S14:** elderly  
**S15:** older people  
**S16:** older adults  
**S17:** older adult  
**S18:** older women  
**S19:** older men  
**S20:** geriatric  
**S21:** geriatrics  
**S22:** frail elderly  
**S23:** elder  
**S24:** elders  
**S25:** aged people  
**S26:** S11 OR S12 OR S13 OR S14 OR S15 OR S16 OR S17 OR S18 OR S19 OR S20 OR  
 21 OR S22 OR S23 OR S24 OR S25  
**S27:** muscle strength  
**S28:** muscle strength dynamometer  
**S29:** strengthening  
**S30:** strength  
**S31:** torque  
**S32:** maximal voluntary contraction  
**S33:** 1RM  
**S34:** one repetition maximum  
**S35:** 1 repetition maximum  
**S36:** muscular endurance  
**S37:** muscle endurance  
**S38:** isometric

**S39:** isometry  
**S40:** muscle power  
**S41:** power  
**S42:** muscular power  
**S43:** power output  
**S44:** functional tests  
**S45:** functional autonomy  
**S46:** functional mobility  
**S47:** S27 OR S28 OR S29 OR S30 OR S31 OR S32 OR S33 OR S34 OR S35 OR S36 OR S37 OR S38 OR S39 OR S40 OR S41 OR S42 OR S43 OR S44 OR S45 OR S46  
**S48:** S10 AND S26 AND S47

**LILACS** (lilacs.bvsalud.org, 1986 to 1, May 2022)

**Title, Abstract and Subject:** ("aged" OR "aging" OR "ageing" OR "elderly" OR "older people" OR "older adults" OR "older adult" OR "older women" OR "older men" OR "geriatric" OR "geriatrics" OR "frail elderly" OR "elder" OR "elders" OR "aged people") AND ("whole body vibration" OR "WBV" OR "vibration" OR "vibration therapy" OR "vibration training" OR "oscillating platforms" OR "vibrating platform" OR "vibration device" OR "mechanical vibration") AND ("muscle strength" OR "muscle strength dynamometer" OR "strengthening" OR "strength" OR "torque" OR "maximal voluntary contraction" OR "1RM" OR "one repetition maximum" OR "1 repetition maximum" OR "muscular endurance" OR "muscle endurance" OR "isometric" OR "isometry" OR "muscle power" OR "power" OR "muscular power" OR "power output" OR "functional tests" OR "functional autonomy" OR "functional mobility")

**PEDro** (pedro.org.au, 2000 to 1, May 2022)

**Abstract and Title:** whole body vibration AND older\*

**ClinicalTrials.gov** and **WHO ICTRP** search strategy

Last searched 1, May 2022

Basic search: whole body vibration AND older

**Supplementary Table S1.** Records that a full text was not found.

| Author                   | Title                                                                                                                                                                                | Journal, volume and page / or web site                     | Reason* |
|--------------------------|--------------------------------------------------------------------------------------------------------------------------------------------------------------------------------------|------------------------------------------------------------|---------|
| Rogan et al., 2011       | Acute effects of stochastic resonance whole body vibration on chair rising performance in the elderly: a pilot study                                                                 | Physiotherapy (United Kingdom). 97:eS1053-eS1054           | 1       |
| Genest et al., 2017      | Combined efficacy of different exercise interventions in osteosarcopenic men                                                                                                         | Journal of Bone and Mineral Research. 32:S398              | 1       |
| Li et al., 2014          | Effects of different interventions on falls and falls-related functional factors in veteran elderly: a pilot randomized controlled trial                                             | Annals of Physical and Rehabilitation Medicine. 57:e153    | 1       |
| Borges et al., 2015      | Effects of whole-body Vibration Exercises on Muscle Strength, Balance and Gait Performance in Elderly Women                                                                          | Archives of Physical Medicine & Rehabilitation. 96:e17-e17 | 1       |
| Von Stengel et al., 2010 | Effects of Whole Body Vibration on vertical versus rotational devices on osteoporotic risk factors - Preliminary results of the ELVIS II study                                       | Osteoporosis International. 21:S380-S381                   | 1       |
| Wu et al., 2011          | Effects of Whole Body Vibration Training on Functional Fitness in Female Elderly                                                                                                     | Medicine & Science in Sports & Exercise. 43:519            | 1       |
| Lee et al., 2019         | Effects of whole body vibration training using side-alternating vibration platform with tilt table in hospitalized older adults with sarcopenia: a randomized controlled pilot study | Aging Medicine and Healthcare. 10:35                       | 1       |
| Seo et al., 2019         | Effects of whole body vibration training using side-alternating vibration platform with tilt table in hospitalized older adults with sarcopenia: a randomized controlled pilot study | Age and Ageing. 48:iv18                                    | 1       |
| Sievänen et al., 2012    | Effect of whole body vibration training on physical performance among institutionalized older people: a 10-WK pilot blinded randomized controlled trial                              | Osteoporosis International. 23:S83-S84                     | 1       |



|                       |                                                                                                                                                                                                                                        |                                                     |   |
|-----------------------|----------------------------------------------------------------------------------------------------------------------------------------------------------------------------------------------------------------------------------------|-----------------------------------------------------|---|
| De Souza et al., 2019 | Efficacy of the association of inspiratory muscle training with whole body vibration on respiratory muscle strength, functionality, balance and physical performance in prefrail older women: a randomized double-blind clinical trial | European Respiratory Journal. 54:PA724              | 1 |
| Rogan et al., 2015    | Feasibility study evaluating the effects of a four weeks stochastic resonance whole-body vibration intervention on functional performance in frail elderly                                                                             | Physiotherapy (United Kingdom). 101:eS1250          | 1 |
| Li et al., 2013       | Low-magnitude, high-frequency vibration treatment reduced fall incidences and fracture risks in community elderly: a prospective cluster-randomized controlled trial and 1 year follow-up                                              | Osteoporosis International. 24: S529                | 1 |
| Rosado et al., 2021   | Novel approaches to reduce the risk of falling in community dwellings: effects of two multimodal programs in lower-body strength—a pilot study                                                                                         | European Journal of Public Health. 31:1             | 1 |
| Zhu et al., 2016      | Tai chi and whole-body vibration therapy in the elderly: a randomized controlled trial                                                                                                                                                 | Journal of the American Geriatrics Society. 64:S373 | 1 |
| Rogan et al., 2011    | The effects of a four-week stochastic resonance whole body vibration training on chair rising performance in the elderly: pilot study                                                                                                  | Physiotherapy (United Kingdom). 97:eS1053           | 1 |
| Bogaerts et al., 2008 | The effects of long term Whole Body Vibration training in older individuals                                                                                                                                                            | Isokinetics & Exercise Science. 16:179-180          | 1 |
| Lark et al., 2017     | Time lag between perceived decreased confidence and actual physical function following 16 weeks vibration training in frail elderly                                                                                                    | New Zealand Journal of Sports Medicine. 44:35       | 1 |
| Wei et al., 2015      | Whole-body vibration training with medium frequency improves muscle performance in people with Sarcopenia                                                                                                                              | Physiotherapy (United Kingdom). 101: eS1620-eS1621  | 1 |

|                     |                                                                                                                                                                                                     |                                                                                                                                                       |   |
|---------------------|-----------------------------------------------------------------------------------------------------------------------------------------------------------------------------------------------------|-------------------------------------------------------------------------------------------------------------------------------------------------------|---|
| Rogan, 2012         | Application of Whole-body Vibration With Stochastic Resonance in Frail Elderly: The Effects on Postural Control                                                                                     | <a href="https://clinicaltrials.gov/show/NCT01543243">https://clinicaltrials.gov/show/NCT01543243</a>                                                 | 2 |
| Borja, 2013         | Cost-utility and cost-effectiveness of a 8-wk whole-body vibration (WBV)-based intervention to improve balance and mobility among older adults with reduced mobility: a randomized controlled trial | <a href="https://trialsearch.who.int/Trial2.aspx?TrialID=ACTRN12613000189729">https://trialsearch.who.int/Trial2.aspx?TrialID=ACTRN12613000189729</a> | 2 |
| Souza, 2018         | Effects of WBV Associated With IMT on Inflammatory Markers, Body Composition, Muscle Strength and Thickness                                                                                         | <a href="https://clinicaltrials.gov/show/NCT03689322">https://clinicaltrials.gov/show/NCT03689322</a>                                                 | 2 |
| Zhang., 2014        | Effects of Whole-body Vibration in the Frail Elderly                                                                                                                                                | <a href="https://clinicaltrials.gov/show/NCT02090192">https://clinicaltrials.gov/show/NCT02090192</a>                                                 | 2 |
| Von Stengel, 2008   | Effects of Whole Body Vibration on Postmenopausal Risk-factors in Elderly Women                                                                                                                     | <a href="https://clinicaltrials.gov/show/NCT00667667">https://clinicaltrials.gov/show/NCT00667667</a>                                                 | 2 |
| Deslandes, 2012     | Effect of Strength Training and Whole Body Vibration in Healthy Elderly                                                                                                                             | <a href="https://clinicaltrials.gov/show/NCT01526109">https://clinicaltrials.gov/show/NCT01526109</a>                                                 | 2 |
| Kalender, 2006      | Effect of Whole Body Vibration on Bone and Fall Related Parameters                                                                                                                                  | <a href="https://clinicaltrials.gov/show/NCT00292916">https://clinicaltrials.gov/show/NCT00292916</a>                                                 | 2 |
| Araújo, 2020        | Efficacy of a multimodal exercise training associated with whole body vibration at falls risk and quality of life in older adults                                                                   | <a href="https://trialsearch.who.int/Trial2.aspx?TrialID=RBR-3xdf4k">https://trialsearch.who.int/Trial2.aspx?TrialID=RBR-3xdf4k</a>                   | 2 |
| Araújo, 2018        | Immediate Effect Of Whole-Body Vibration And Walk in Osteoporosis/Osteopenia                                                                                                                        | <a href="https://clinicaltrials.gov/show/NCT03448276">https://clinicaltrials.gov/show/NCT03448276</a>                                                 | 2 |
| Lim, 2018           | Impact of Whole-body Vibration Training on Sarcopenic Elderly                                                                                                                                       | <a href="https://clinicaltrials.gov/show/NCT03695354">https://clinicaltrials.gov/show/NCT03695354</a>                                                 | 2 |
| Wei, 2017           | The effects and mechanism of whole body vibration training on muscle performance, physical performance and balance in the older people with age-related loss of muscle mass                         | <a href="https://trialsearch.who.int/Trial2.aspx?TrialID=ISRCTN63583948">https://trialsearch.who.int/Trial2.aspx?TrialID=ISRCTN63583948</a>           | 2 |
| Manimmanakorn, 2018 | The effects of weighted vest and whole body vibration on body balance in the elderly                                                                                                                | <a href="https://trialsearch.who.int/Trial2.aspx?TrialID=TCCTR20190306001">https://trialsearch.who.int/Trial2.aspx?TrialID=TCCTR20190306001</a>       | 2 |

|                     |                                                                                                                                                  |                                                                                                                                                       |   |
|---------------------|--------------------------------------------------------------------------------------------------------------------------------------------------|-------------------------------------------------------------------------------------------------------------------------------------------------------|---|
| Lai, 2016           | The Effectiveness of Whole-Body Vibration With Hot Pack on Muscle strength, Balance Performance, and Flexibility in the Elderly                  | <a href="https://trialsearch.who.int/Trial2.aspx?TrialID=ChiCTR-IOR-16008059">https://trialsearch.who.int/Trial2.aspx?TrialID=ChiCTR-IOR-16008059</a> | 2 |
| Verschueren, 2011   | The Effect of 6 Months of Local Vibration Training in Institutionalized Elderly                                                                  | <a href="https://clinicaltrials.gov/show/NCT01499186">https://clinicaltrials.gov/show/NCT01499186</a>                                                 | 2 |
| Jounaghani, 2014    | Vibration and Creatine Effects on Physical Fitness                                                                                               | <a href="https://trialsearch.who.int/Trial2.aspx?TrialID=IRCT2014061517743N2">https://trialsearch.who.int/Trial2.aspx?TrialID=IRCT2014061517743N2</a> | 2 |
| Machado, 2016       | Whole Body Vibrations on Functional Capacity, Muscular Strength, and Biochemical Profile in Elders                                               | <a href="https://clinicaltrials.gov/ct2/show/study/NCT03030456">https://clinicaltrials.gov/ct2/show/study/NCT03030456</a>                             | 2 |
| Zhang et al., 2013  | Effects of Whole-Body Vibration Exercise on Lower-Extremity Muscle Strength and Power of the Elderly                                             | Journal of Shenyang Sport University. 32:79-81                                                                                                        | 3 |
| Li et al., 2018     | Effects of whole body vibration training at different frequencies on the balance, lower limb muscle strength and position sense of elderly women | Journal of Physical Education / TiYu Xuekan. 25:128-134                                                                                               | 3 |
| Amaral et al., 2014 | Whole-body vibration training does not modify anthropometric parameters and lower limb strength in elderly people                                | Clinical and Experimental Medical Letters. 55:6-10                                                                                                    | 3 |
| McClain, 2014       | The effect of whole body vibration training on balance and strength of the lower extremity muscles in older individuals                          | These. Doctor in Physical Therapy, Florida Gulf Coast University                                                                                      | 3 |

\* Reasons: 1 – Abstract published in Conference; 2 – Clinical trial registration; 3 – Full report not found.

**Supplementary Table S2.** Reports excluded in the full text reading phase.

| <b>Author and year</b>     | <b>Title</b>                                                                                                                                                                                     | <b>Journal, volume and page</b>                                         | <b>Reason*</b> |
|----------------------------|--------------------------------------------------------------------------------------------------------------------------------------------------------------------------------------------------|-------------------------------------------------------------------------|----------------|
| Grubbs et al. (2020)       | Whole-body Vibration Training in Frail, Skilled Nursing Home Residents                                                                                                                           | International Journal of Exercise Science. 13:140-156                   | 1              |
| He et al. (2020)           | The Genetic Effect on Muscular Changes in an Older Population: A Follow-Up Study after One-Year Cessation of Structured Training                                                                 | Genes. 11:968                                                           | 1              |
| Cheung et al. (2016)       | Improvement in muscle performance after one-year cessation of low-magnitude high-frequency vibration in community elderly                                                                        | Journal of Musculoskeletal & Neuronal Interactions. 16:4-11             | 1              |
| Lark et al. (2015)         | Physiological, psychological and functional changes with whole body vibration exercise in the elderly: FEVER methodology and protocols                                                           | Contemporary Clinical Trials. 44:129-133                                | 1              |
| Kennis et al. (2013)       | Effects of Fitness and Vibration Training on Muscle Quality: A 1-Year Postintervention Follow-Up in Older Men                                                                                    | Archives of Physical Medicine and Rehabilitation. 94:910-918            | 1              |
| Cristi et al. (2014)       | Whole-body vibration training increases physical fitness measures without alteration of inflammatory markers in older adults                                                                     | European Journal of Sport Science. 14:611-619                           | 1              |
| Carr et al. (2012)         | Whole-body Vibration Training in Older Adults: Retention of the Strengthening Effects                                                                                                            | Critical Reviews in Physical and Rehabilitation Medicine. 24:51-67      | 1              |
| Sitjà-Rabert et al. (2011) | Whole body vibration for older persons: an open randomized, multicentre, parallel, clinical trial                                                                                                | BMC Geriatrics. 11:89                                                   | 1              |
| Bemben et al. (2010)       | Effects of combined whole-body vibration and resistance training on muscular strength and bone metabolism in postmenopausal women                                                                | Bone. 47:650-656                                                        | 1              |
| Silva et al. (2010)        | Efeito do treinamento vibratório na força muscular e em testes funcionais em idosos fisicamente ativos                                                                                           | Revista Brasileira de Cineantropometria e Desempenho Humano. 11:166-173 | 1              |
| Lin and Woollacott (2005)  | Association between sensorimotor function and functional and reactive balance control in the elderly                                                                                             | Age and Ageing. 34:358-363                                              | 1              |
| Tsuji et al. (2012)        | Effects of static acceleration training with a whole-body vibration machine in community-dwelling older adults                                                                                   | Japanese Journal of Physical Fitness and Sports Medicine. 61:2011-219   | 1              |
| Kessler et al. (2014)      | Effect of stochastic resonance whole body vibration on functional performance in the frail elderly: A pilot study                                                                                | Archives of Gerontology and Geriatrics. 59:305-311                      | 2              |
| Rogan et al. (2015)        | Preliminary inconclusive results of a randomised double blinded cross-over pilot trial in long-term-care dwelling elderly assessing the feasibility of stochastic resonance whole-body vibration | European Review of Aging and Physical Activity. 12:5                    | 2              |
| Tankisheva et al. (2015)   | Effects of a Six-Month Local Vibration Training on Bone Density, Muscle Strength, Muscle Mass, and Physical Performance in Postmenopausal Women                                                  | Journal of Strength and Conditioning Research. 29:2613-2622             | 2              |
| Bellomo et al. (2013)      | Muscle Strength and Balance Training in Sarcopenic Elderly: A Pilot Study with Randomized Controlled Trial                                                                                       | European Journal of Inflammation. 11:193-201                            | 2              |
| Wadsworth and Lark (2020)  | Effects of Whole-Body Vibration Training on the Physical Function of the Frail Elderly: An Open, Randomized Controlled Trial                                                                     | Archives of Physical Medicine and Rehabilitation. 101, 1111-1119        | 3              |

|                            |                                                                                                                                                                                                               |                                                                                        |   |
|----------------------------|---------------------------------------------------------------------------------------------------------------------------------------------------------------------------------------------------------------|----------------------------------------------------------------------------------------|---|
| Saedmocheshi et al. (2014) | Effect of whole body vibration on muscle performance in elderly men                                                                                                                                           | Medical Journal of Tabriz University of Medical Sciences and Health Services. 36:34-39 | 3 |
| Pollock et al. (2012)      | Whole-body vibration in addition to strength and balance exercise for falls-related functional mobility of frail older adults: a single-blind randomized controlled trial                                     | Clinical Rehabilitation. 26:915-923                                                    | 3 |
| Rogan et al. (2012)        | Stochastic resonance whole-body vibration training for chair rising performance on untrained elderly: A pilot study                                                                                           | Archives of Gerontology and Geriatrics. 55:468-473                                     | 3 |
| Von Stengel et al. (2011)  | Effects of whole body vibration on bone mineral density and falls: results of the randomized controlled ELVIS study with postmenopausal women                                                                 | Osteoporosis International. 22:317-325                                                 | 3 |
| Gloeckl et al. (2017)      | What's the secret behind the benefits of whole-body vibration training in patients with COPD? A randomized, controlled trial                                                                                  | Respiratory Medicine. 126:17-24                                                        | 4 |
| Perchthaler et al. (2015)  | Evaluation of a Six-Week Whole-Body Vibration Intervention on Neuromuscular Performance in Older Adults                                                                                                       | Journal of Strength and Conditioning Research. 29:86-95                                | 4 |
| Roelants et al. (2004)     | Whole-Body-Vibration Training Increases Knee-Extension Strength and Speed of Movement in Older Women                                                                                                          | Journal of the American Geriatrics Society. 52:901-908                                 | 4 |
| Verschuere et al. (2004)   | Effect of 6-Month Whole Body Vibration Training on Hip Density, Muscle Strength, and Postural Control in Postmenopausal Women: A Randomized Controlled Pilot Study                                            | Journal of Bone and Mineral Research. 19:352-359                                       | 4 |
| Russo et al. (2003)        | High-frequency vibration training increases muscle power in postmenopausal women                                                                                                                              | Archives of Physical Medicine and Rehabilitation. 84:1854-1857                         | 4 |
| Jo et al. (2021)           | Effectiveness of Whole-Body Vibration Training to Improve Muscle Strength and Physical Performance in Older Adults: Prospective, Single-Blinded, Randomized Controlled Trial                                  | Healthcare.31:652                                                                      | 5 |
| Pouyafar et al. (2021)     | Comparing the Effects of Eight Weeks of Whole Body Vibration Exercise Combined With Rope Skipping at Two Different Intensities on Physical Performance of Older Men: A Randomized Single-Blind Clinical Trial | Salmand: Iranian Journal of Ageing. 16:376-395                                         | 5 |
| Bruin et al. (2020)        | Combining Stochastic Resonance Vibration With Exergaming for Motor-Cognitive Training in Long-Term Care; A Sham-Control Randomized Controlled Pilot Trial                                                     | Frontiers in Medicine. 30:507155                                                       | 5 |
| Rogan et al. (2016)        | Sensory-motor training targeting motor dysfunction and muscle weakness in long-term care elderly combined with motivational strategies: a single blind randomized controlled study                            | European Review of Aging and Physical Activity. 13:4                                   | 5 |
| Ramos et al. (2019)        | A single whole body vibration session influences quadriceps muscle strength, functional mobility and balance of elderly with osteopenia and/or osteoporosis? Pragmatic clinical trial                         | Journal of Diabetes & Metabolic Disorders. 18:73-80                                    | 6 |
| Rogan et al. (2014)        | Immediate effects after stochastic resonance whole-body vibration on physical performance on frail elderly for skilling-up training: a blind cross-over randomised pilot study                                | Aging Clinical and Experimental Research. 26:519-527                                   | 6 |

|                        |                                                                                                                                                                                                                    |                                                                    |   |
|------------------------|--------------------------------------------------------------------------------------------------------------------------------------------------------------------------------------------------------------------|--------------------------------------------------------------------|---|
| Giombini et al. (2013) | Acute Effect of Whole-Body Vibration at Optimal Frequency on Muscle Power Output of the Lower Limbs in Older Women                                                                                                 | American Journal of Physical Medicine & Rehabilitation. 92:797-804 | 6 |
| Cochrane et al. (2008) | A Comparison of the Physiologic Effects of Acute Whole-Body Vibration Exercise in Young and Older People                                                                                                           | Archives of Physical Medicine and Rehabilitation. 89:815-821       | 6 |
| Klarner et al. (2011)  | Effekte unterschiedlicher Ganzkörpervibrationssysteme auf die neuromuskuläre Leistungsfähigkeit und die Körperzusammensetzung postmenopausaler Frauen Ergebnisse der kontrollierten randomisierten ELVIS-II-Studie | Deutsche Medizinische Wochenschrift. 136:2133-2139                 | 8 |
| Kemmler et al. (2010)  | Effekte von Ganzkörpervibrationen auf die neuromuskuläre Leistungsfähigkeit von Frauen über dem 65. Lebensjahr: Einjahresergebnisse der kontrollierten randomisierten ELVIS-Studie                                 | Zeitschrift für Gerontologie und Geriatrie. 43:125-132             | 8 |
| Rees et al. (2008)     | Effects of Whole-Body Vibration Exercise on Lower-Extremity Muscle Strength and Power in an Older Population: A Randomized Clinical Trial                                                                          | Physical Therapy. 88:462-470                                       | 8 |

\* Reasons: 1 – Not RCT (Randomized Clinical Trial); 2 – Not sinusoidal WBV; 3 – Did not assess outcomes of interest; 4 – Age group < 60 years; 5 – WBV associated with another intervention; 6 – Only evaluated acute effect; 7 – Did not stand during WBV; 8 – Information in another RCT included.

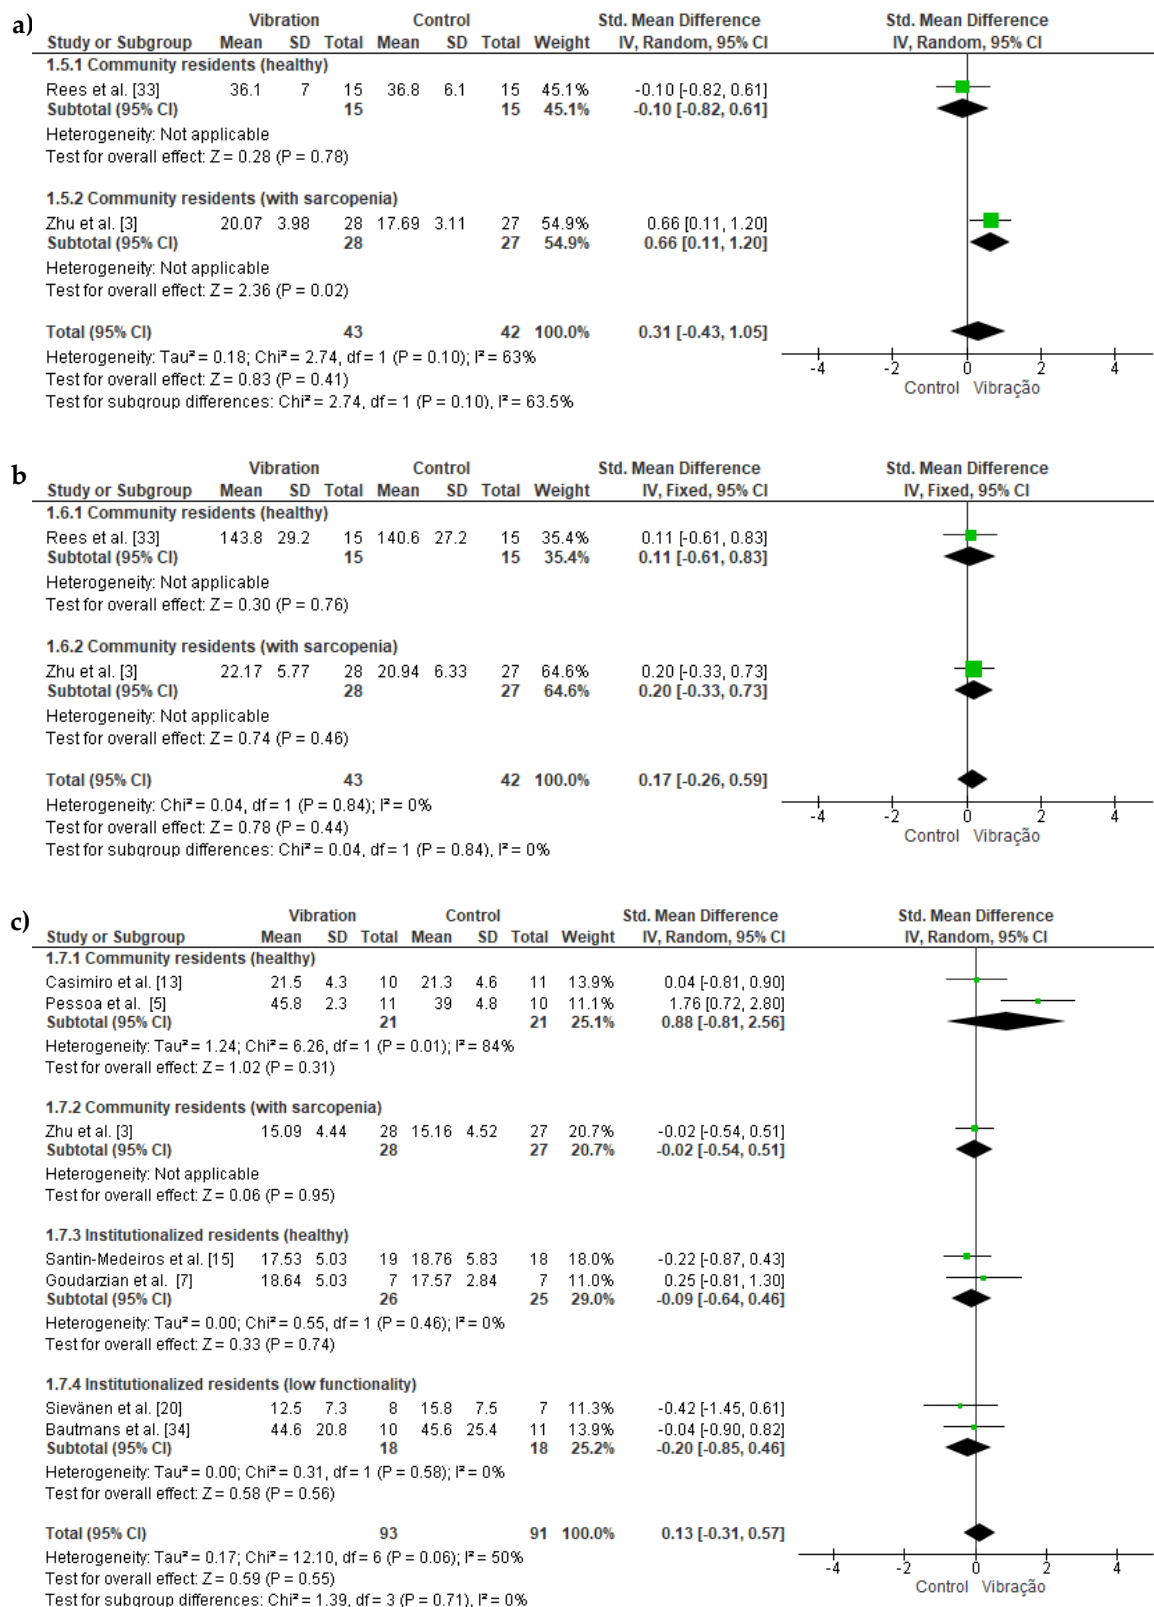

**Supplementary Figure S1.** Primary analysis comparing the effectiveness of WBV vs. control groups for muscle strength: a) ankle dorsiflexors; b) hip flexors; c) hand grip.

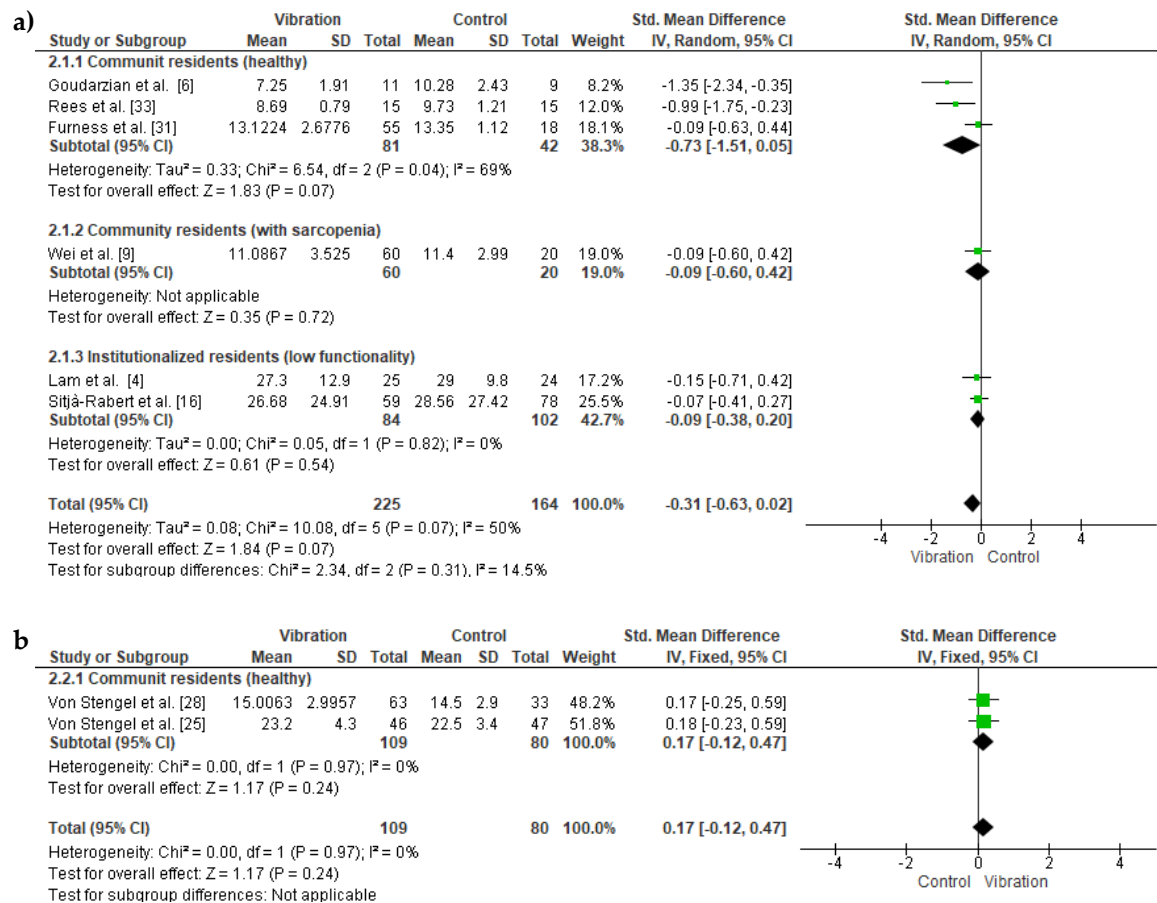

**Supplementary Figure S2.** Primary analysis comparing the effectiveness of WBV vs. control groups for muscle power: a) five-times-sit-to-stand test; b) countermovement jump.



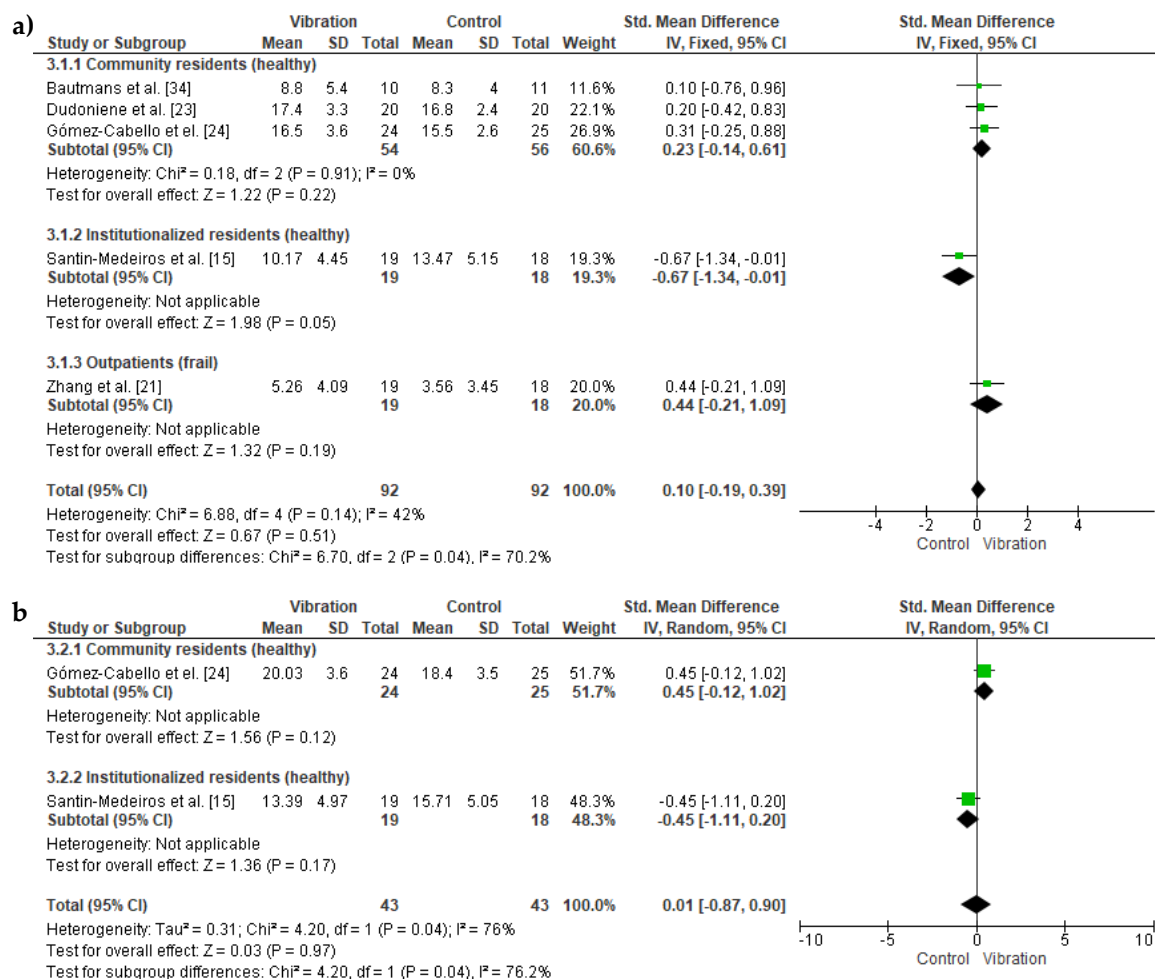

**Supplementary Figure S3.** Primary analysis comparing the effectiveness of WBV vs. control groups for muscular endurance: a) 30-second sit to stand; b) 30-second arm curl.

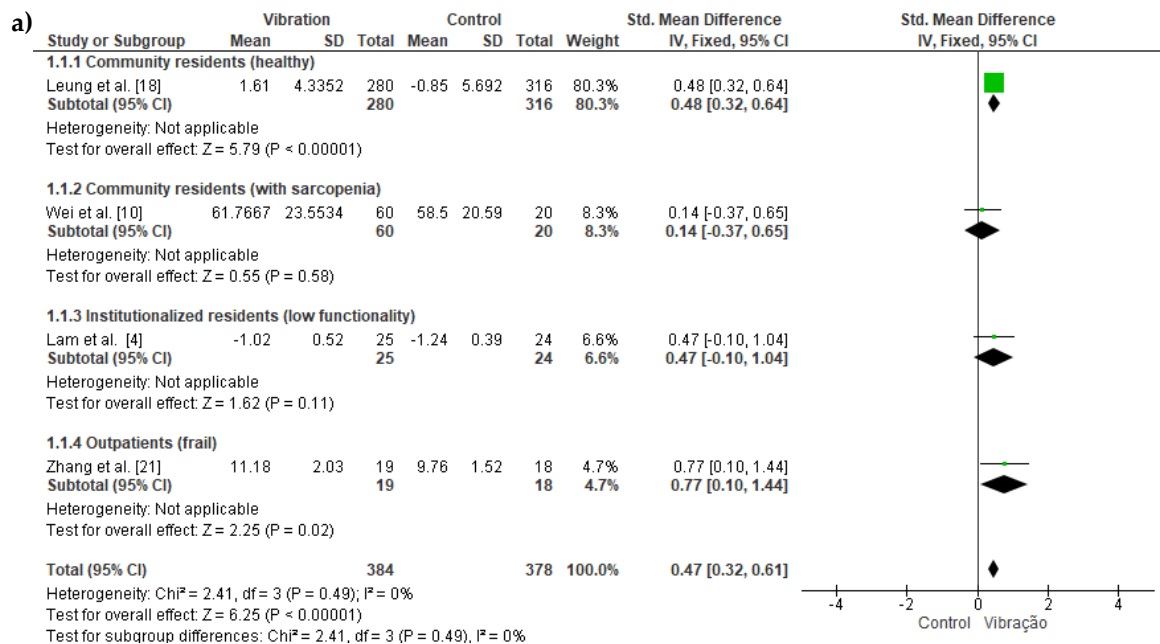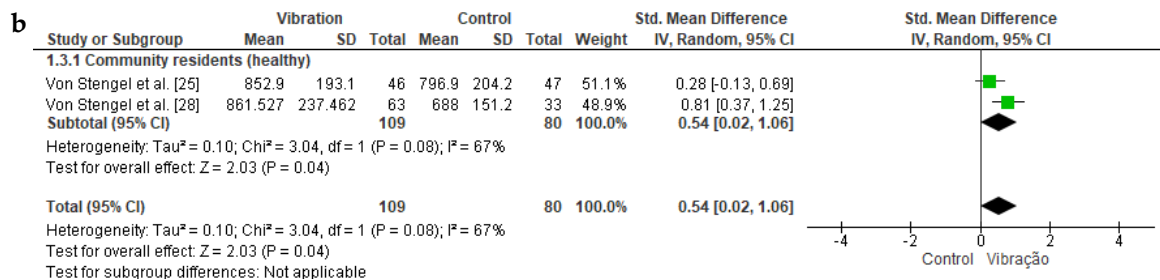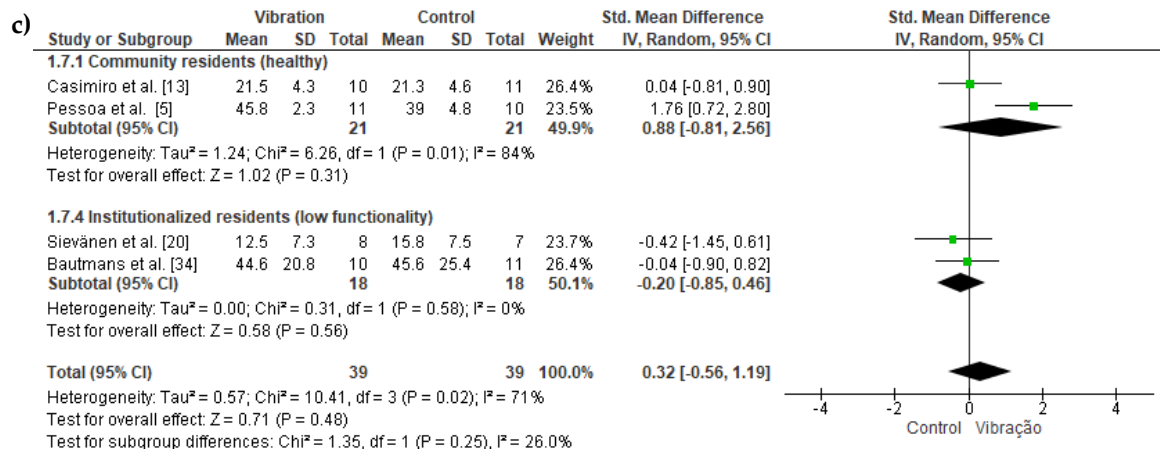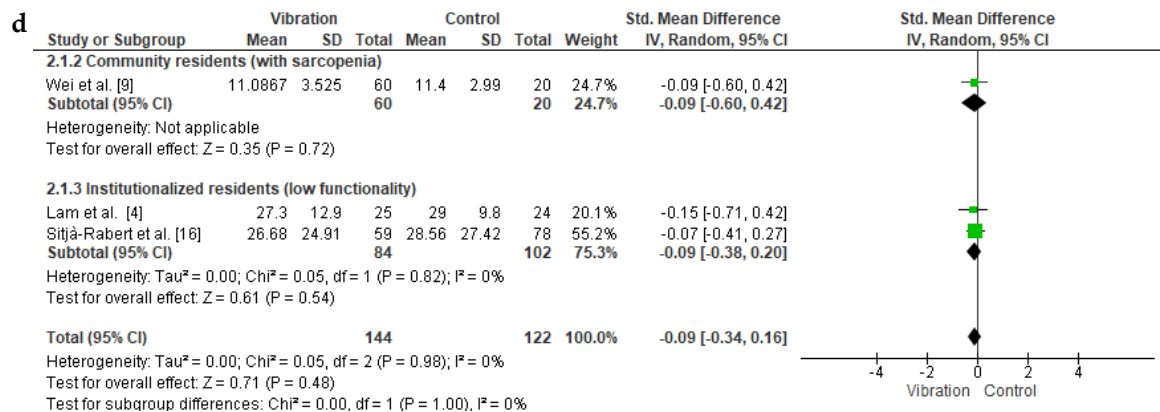

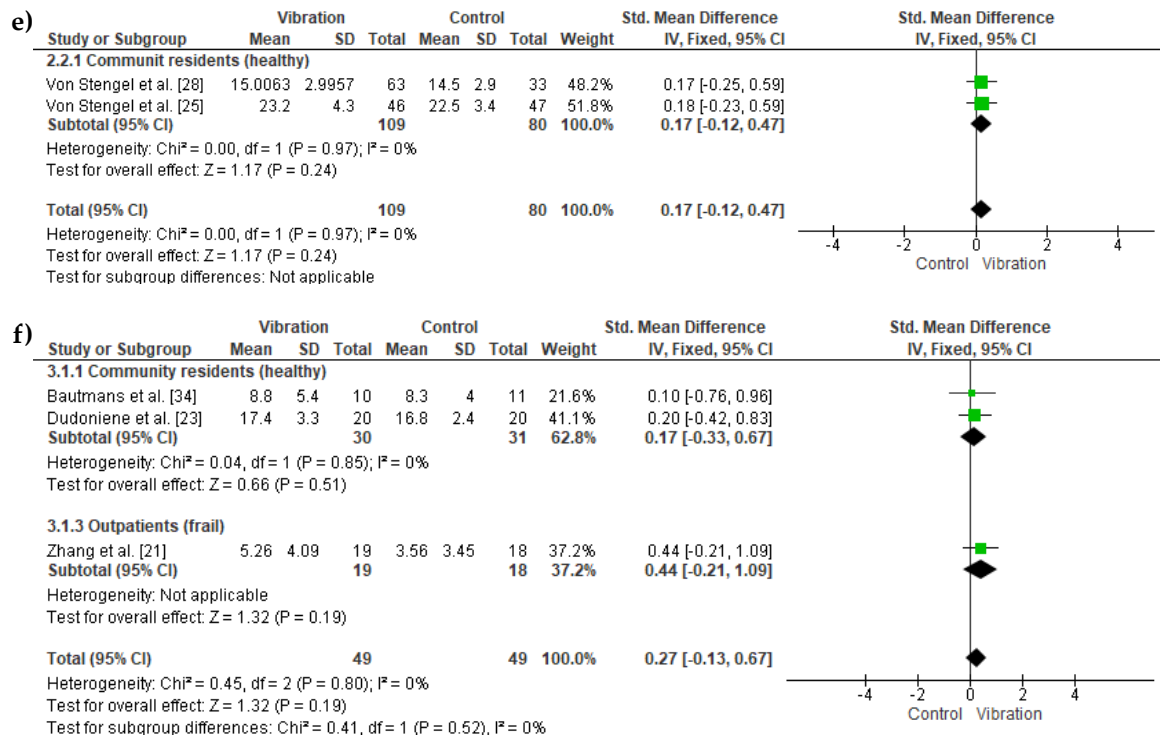

**Supplementary Figure S4.** Sensitivity analysis comparing the effectiveness of WBV vs. control groups for: a) knee extensor muscle strength; b) muscular strength of the extensors of the lower limbs; c) handgrip strength; d) five-times-sit-to-stand; e) counter movement jump; f) 30-second sit-to-stand test.

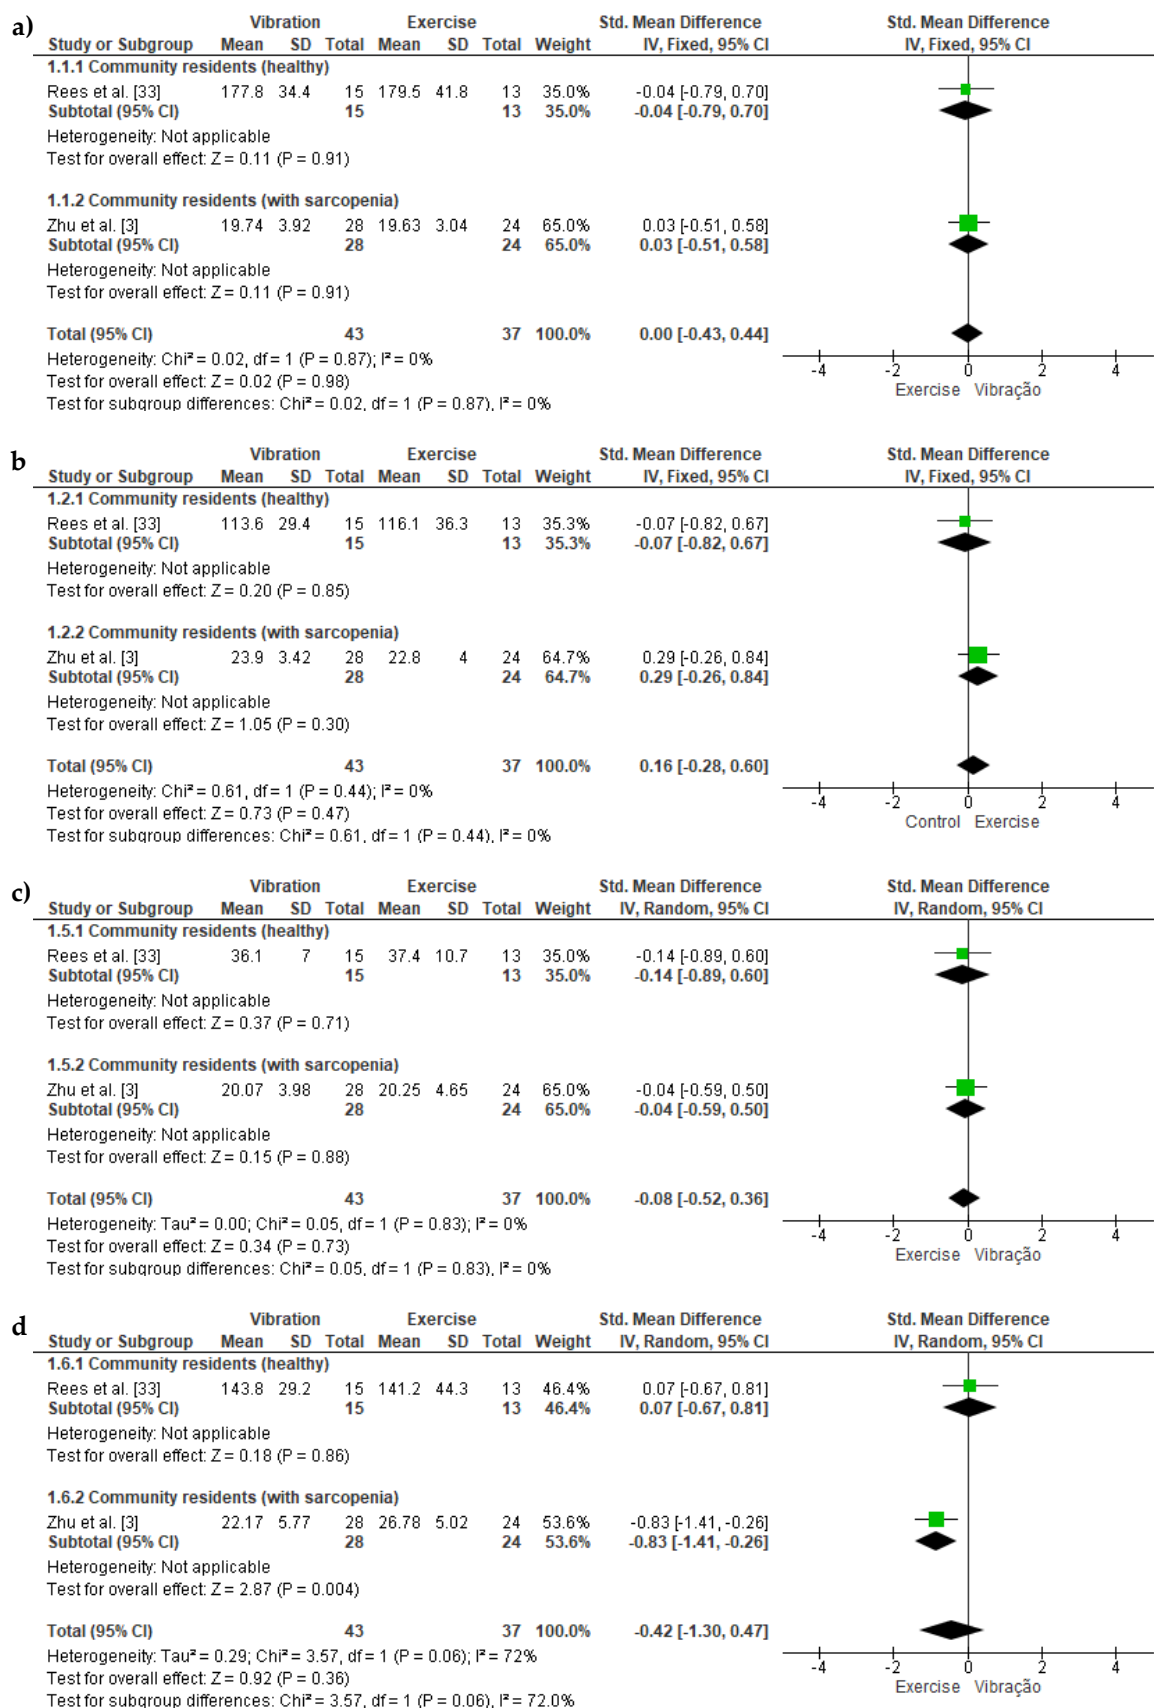

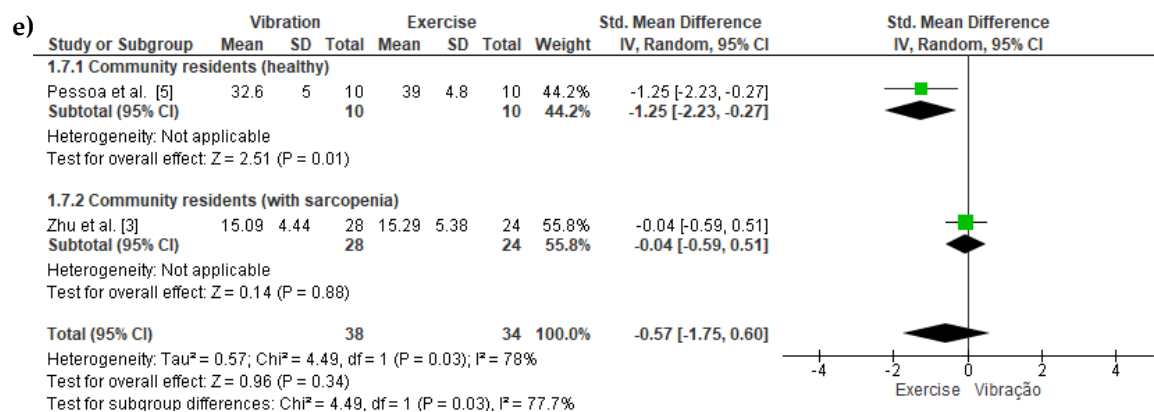

**Supplementary Figure S5.** Analysis comparing the effectiveness of WBV vs. other forms of exercise for muscle strength: a) knee extensors; b) knee flexors; c) ankle dorsiflexors; d) hip flexors; e) hand grip.

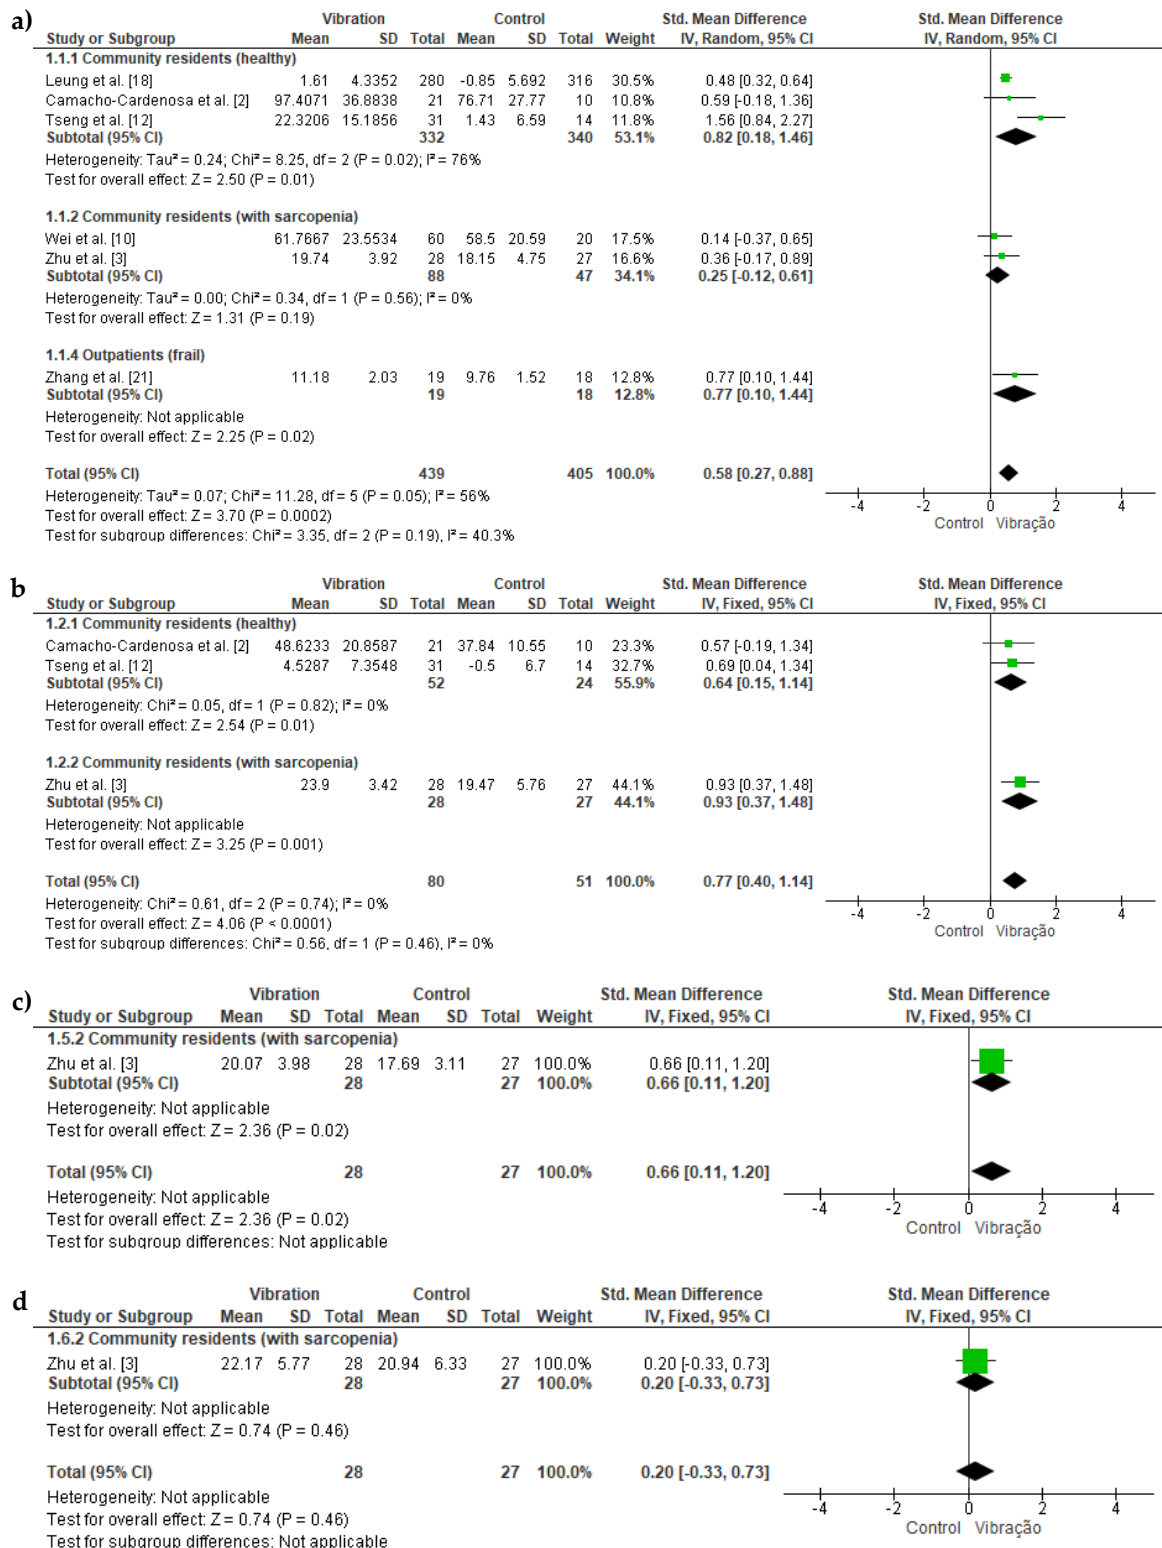

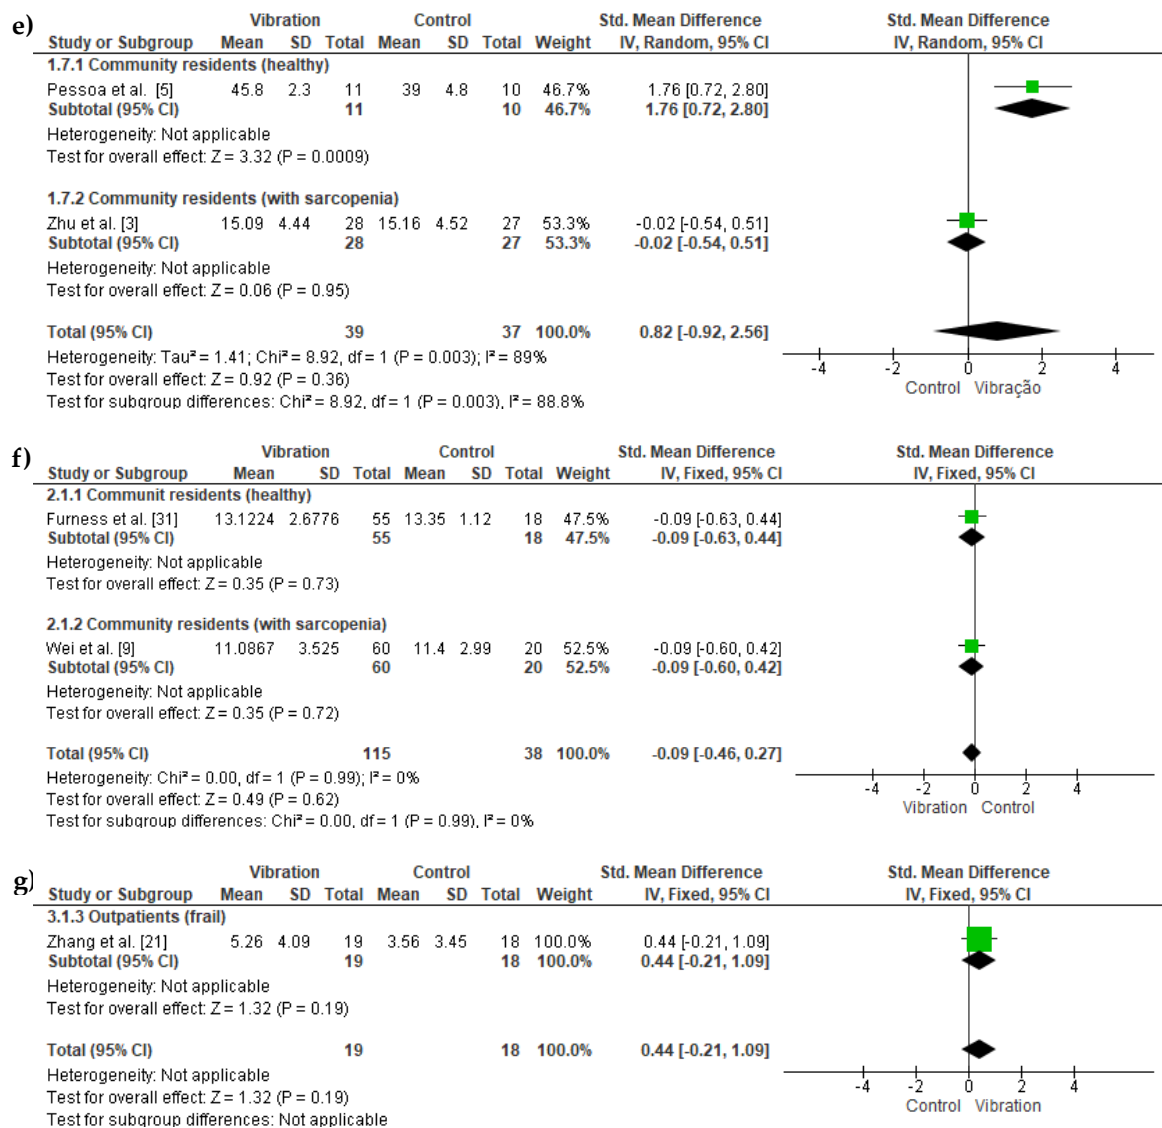

**Supplementary Figure S6.** Analysis comparing the effectiveness of WBV with participants maintaining a static position vs. control groups: a) muscle strength of the knee extensors; b) muscle strength of the knee flexors; c) muscular strength of the ankle dorsiflexors; d) muscle strength of the hip flexors; e) handgrip muscle strength; f) five-times-sit-to-stand; g) 30-s sit-to-stand.

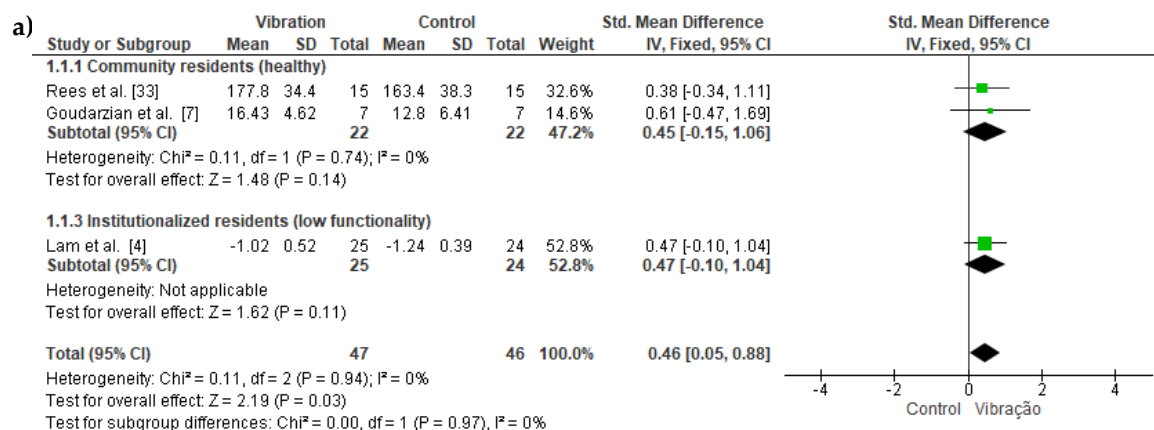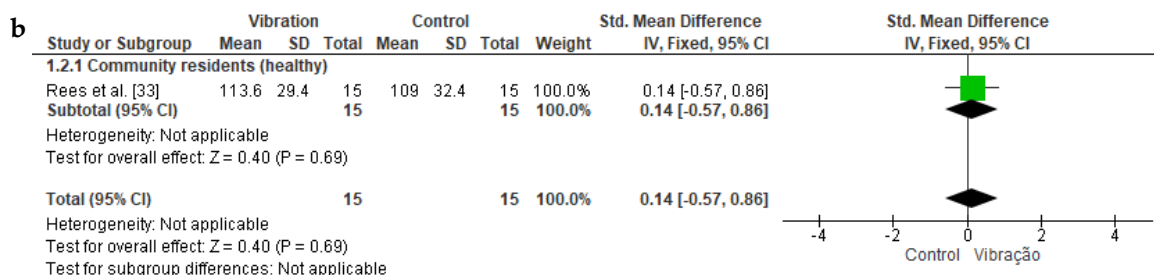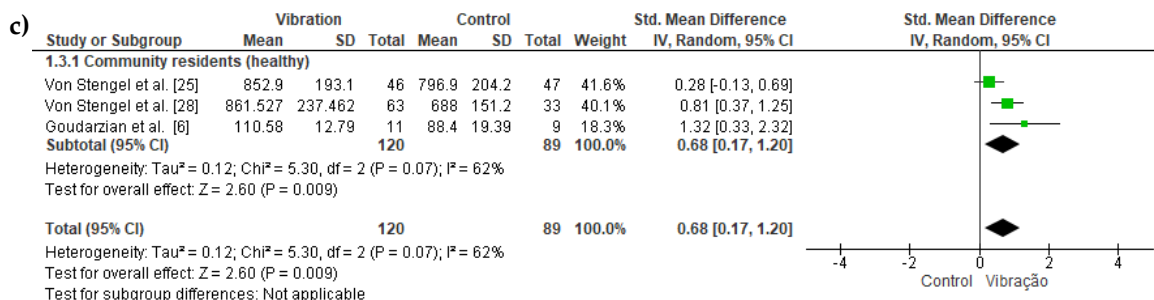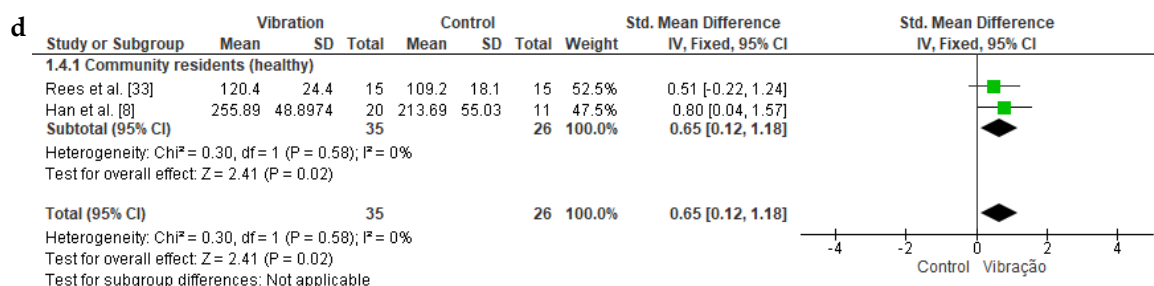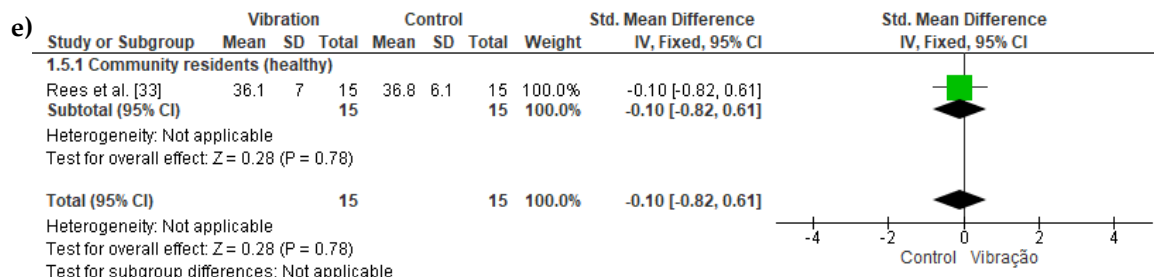



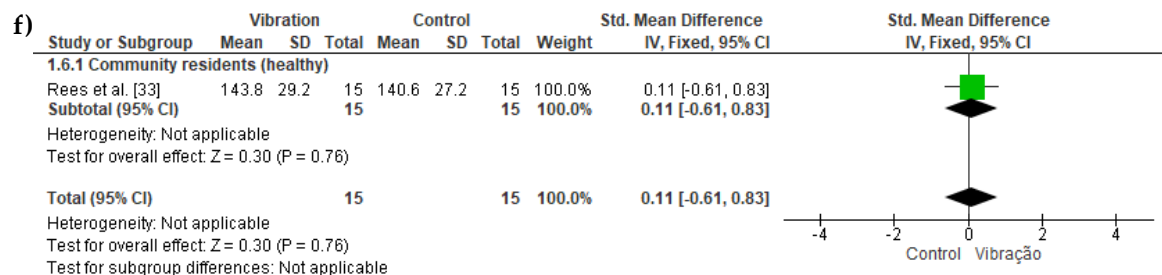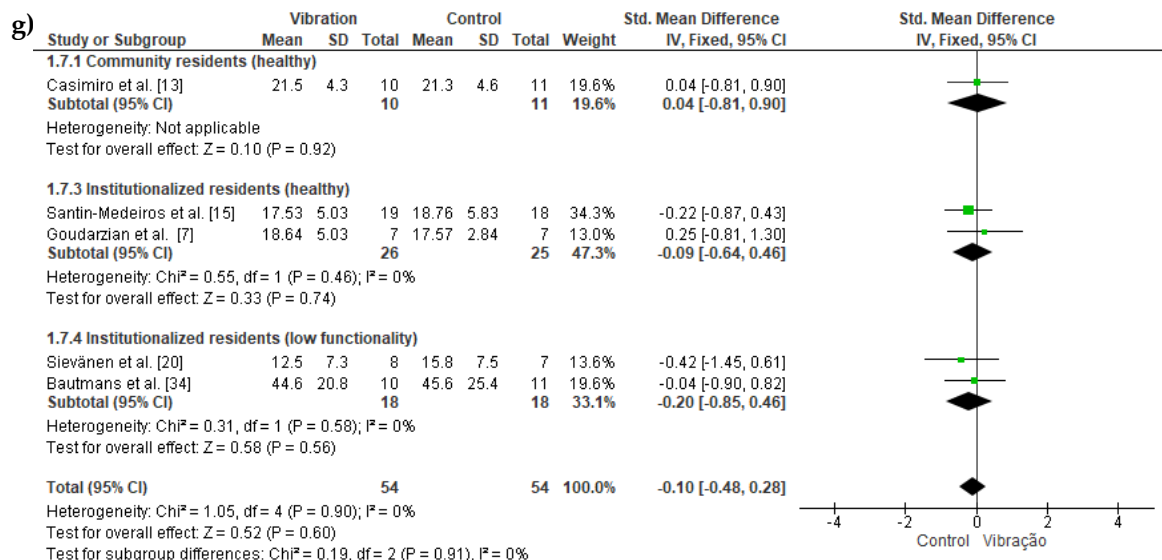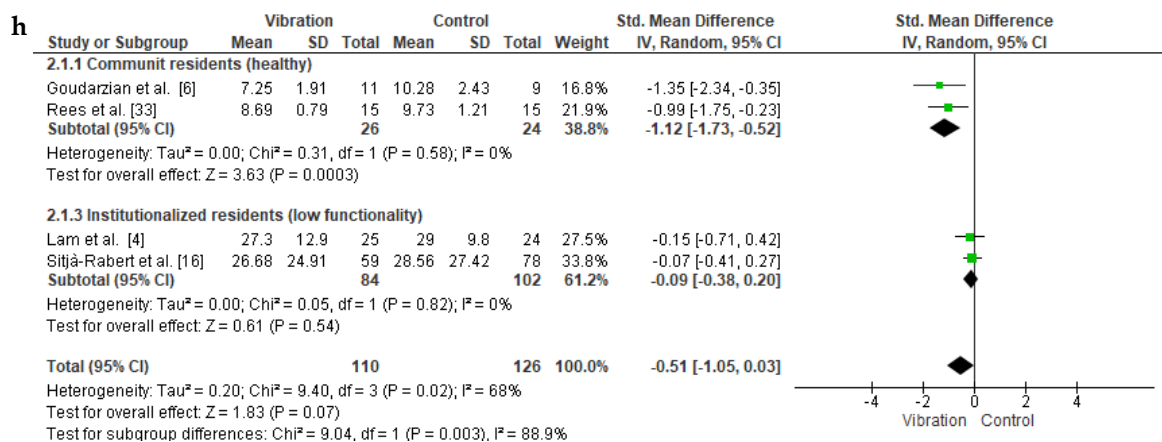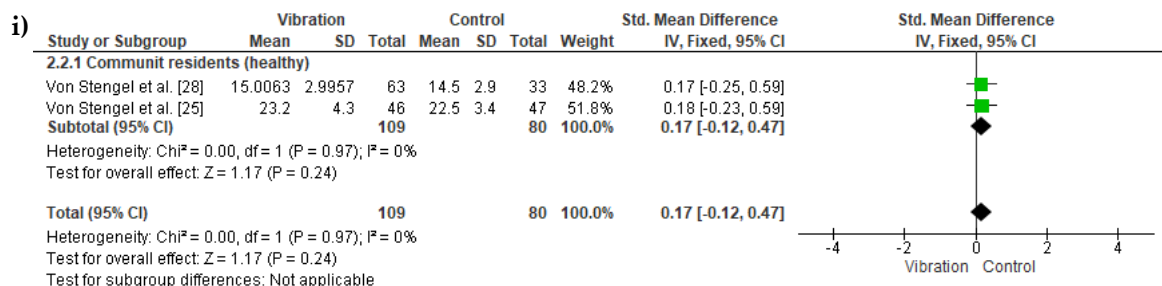

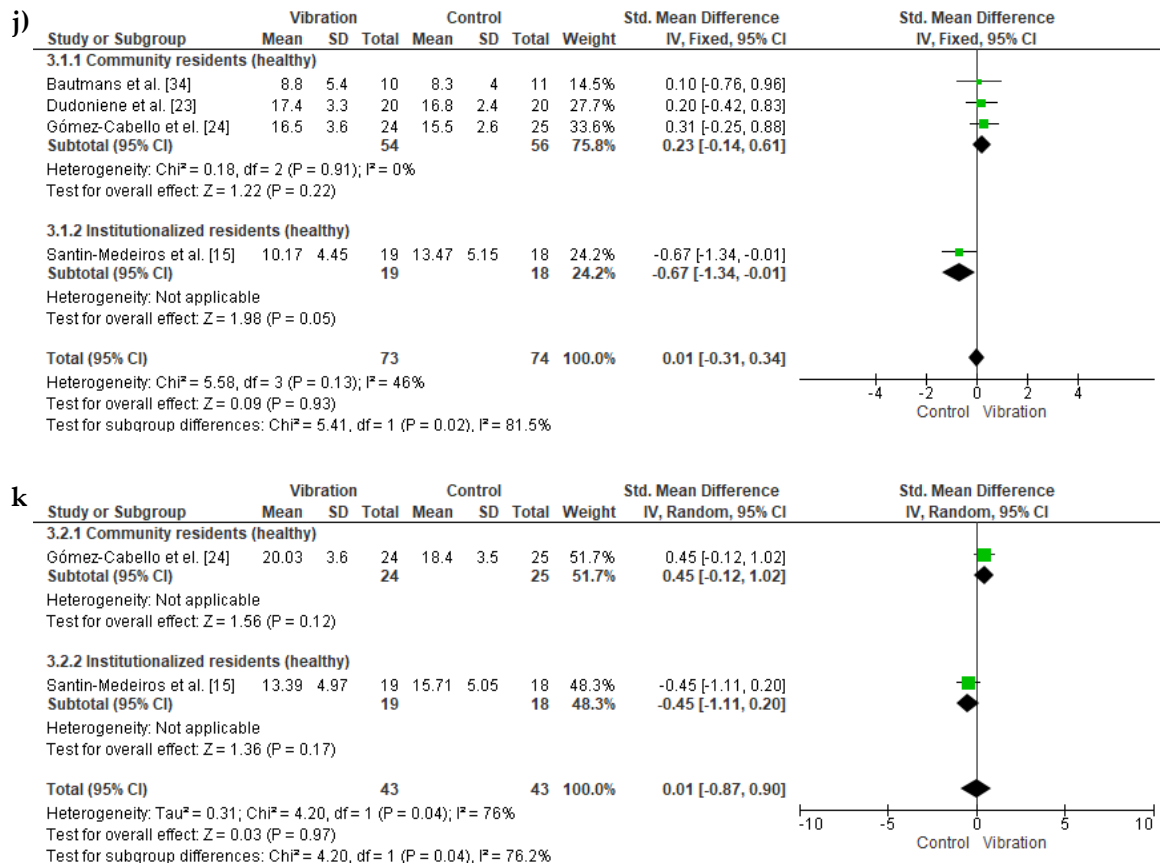

**Supplementary Figure S7.** Analysis comparing the effectiveness of WBV with participants performing muscle-strengthening exercises vs. control groups: a) muscle strength of the knee extensors; b) muscle strength of the knee flexors; c) muscular strength of the extensors of the lower limbs; d) muscular strength of the plantar flexors; e) muscular strength of the ankle dorsiflexors; f) muscle strength of the hip flexors; g) handgrip muscle strength; h) five-times-sit-to-stand; i) countermovement jump; j) 30-s sit-to-stand; k) 30-s arm curl.

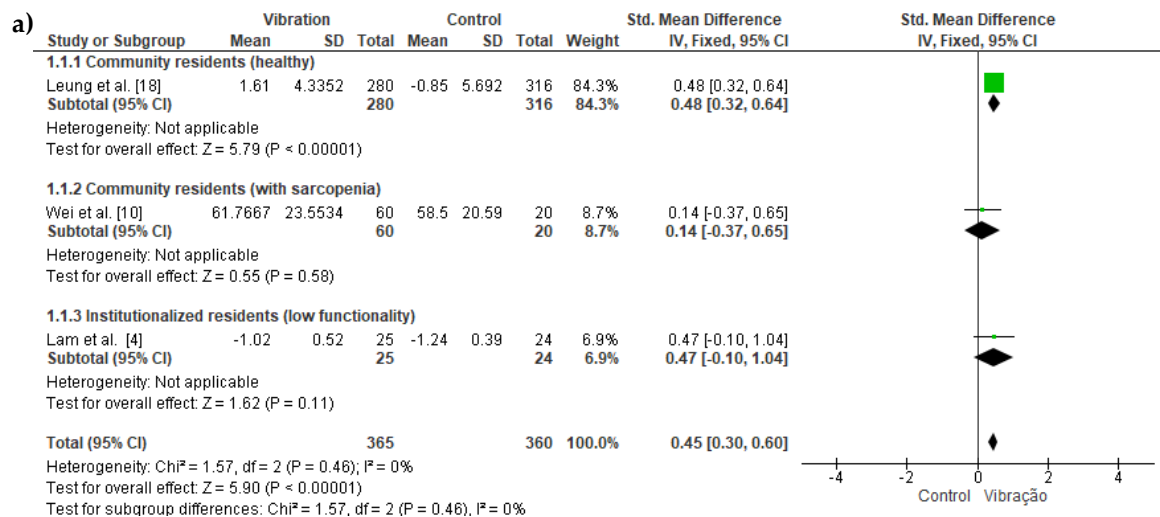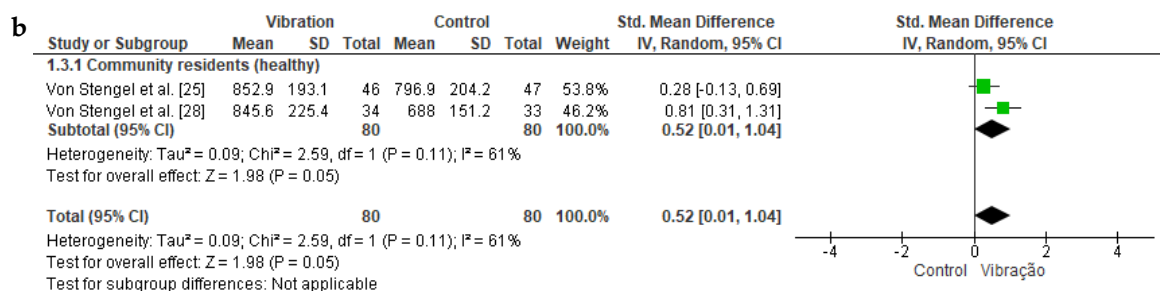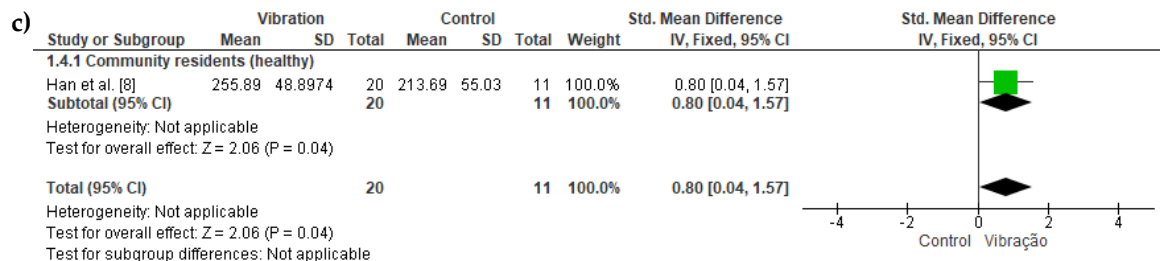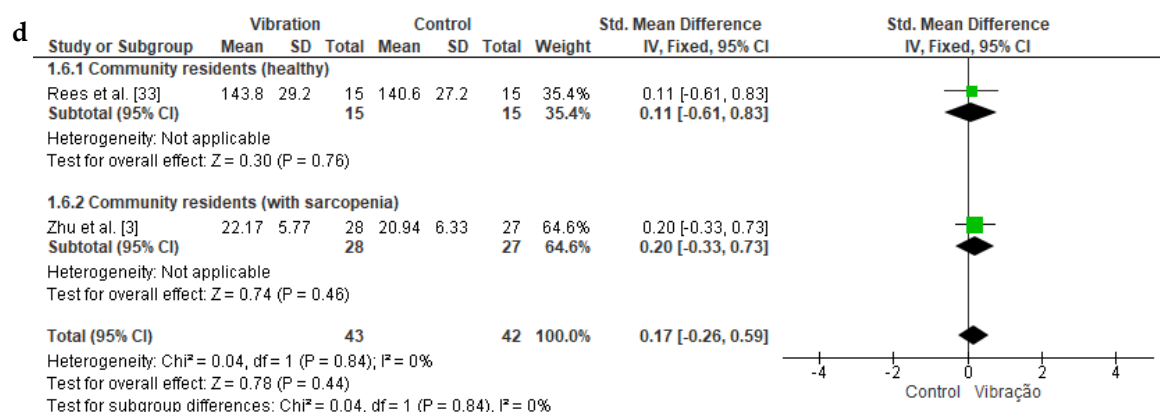

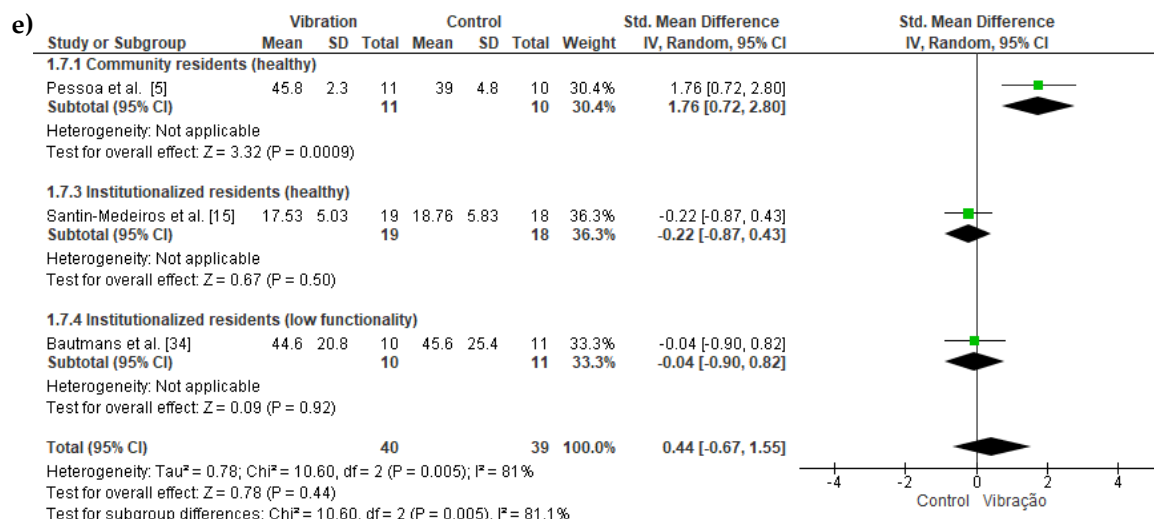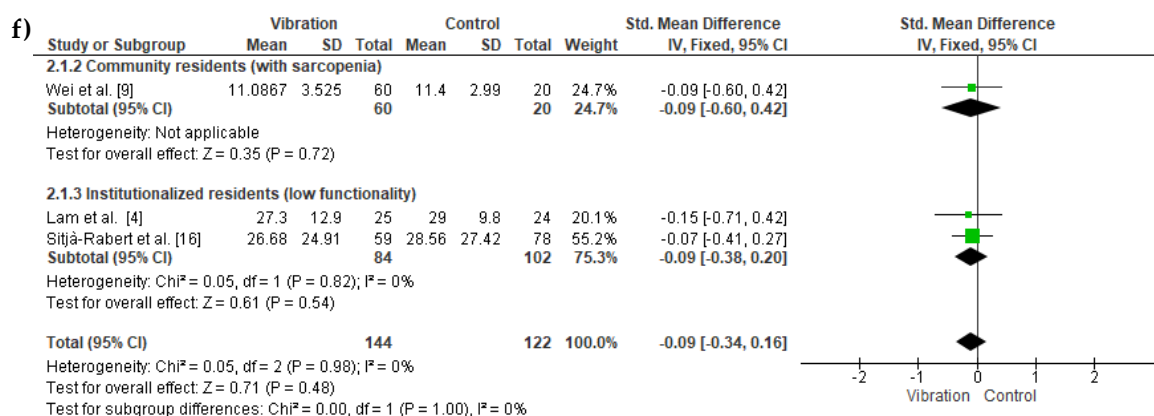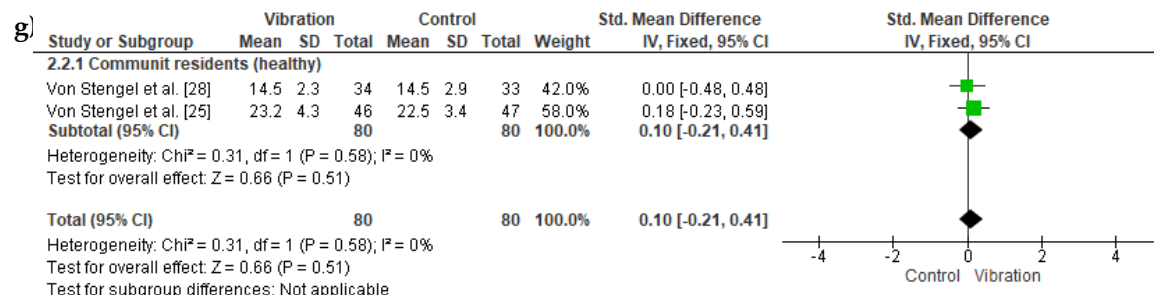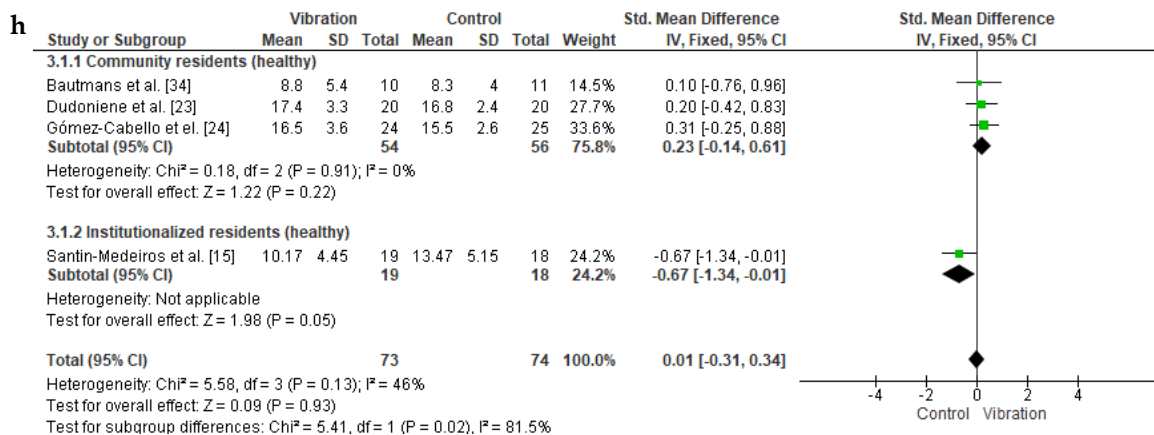

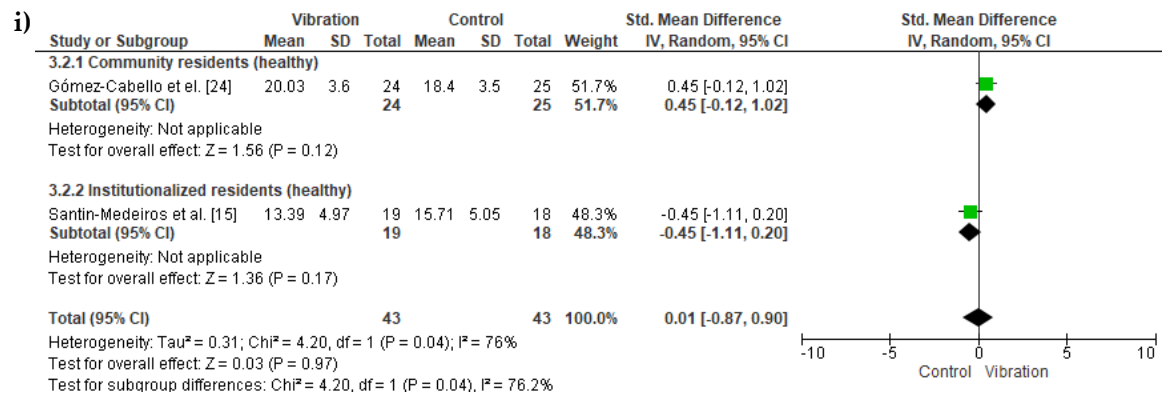

**Supplementary Figure S8.** Analysis comparing the effectiveness of WBV vs. control groups on synchronous type platforms: a) knee extensor muscle strength; b) muscular strength of the extensors of the lower limbs; c) muscular strength of the plantar flexors; d) muscle strength of the hip flexors; e) handgrip muscle strength; f) five-times-sit-to-stand; g) countermovement jump; h) 30-s sit-to-stand; i) 30-s arm curl.

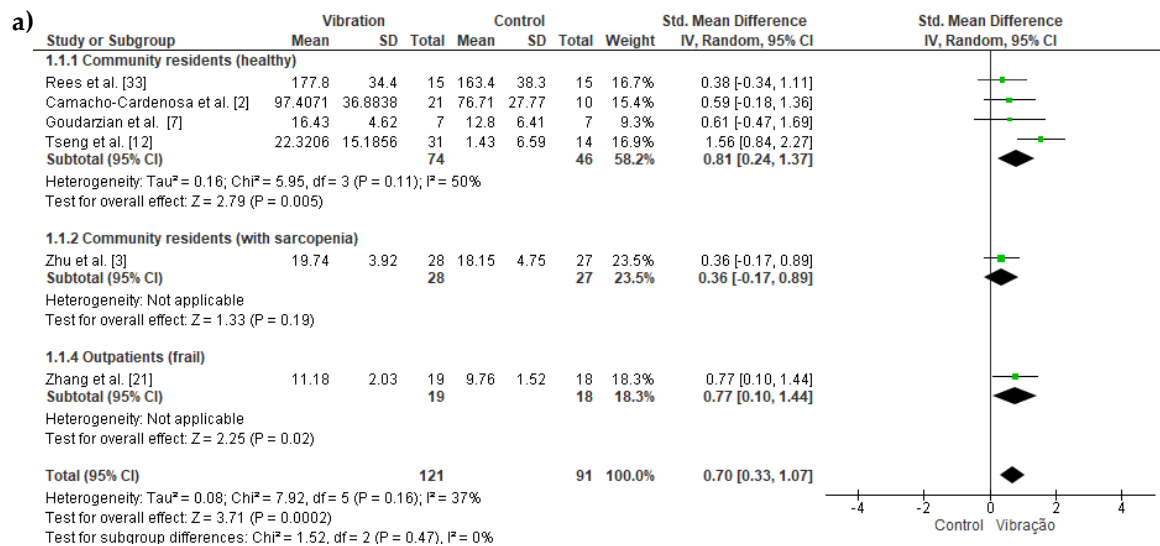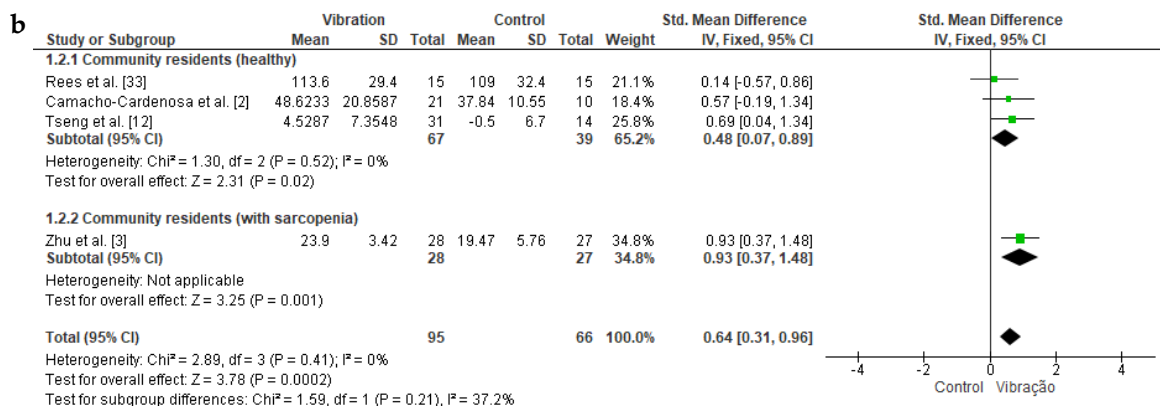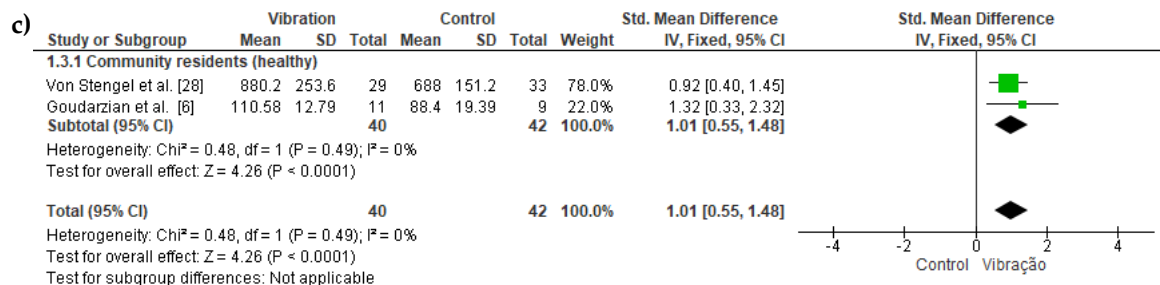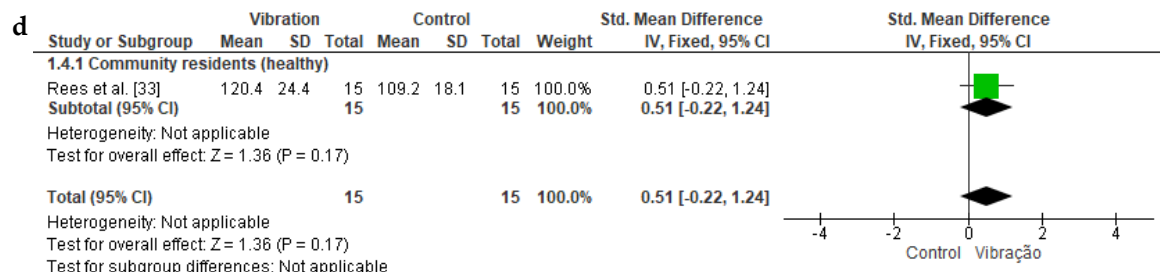

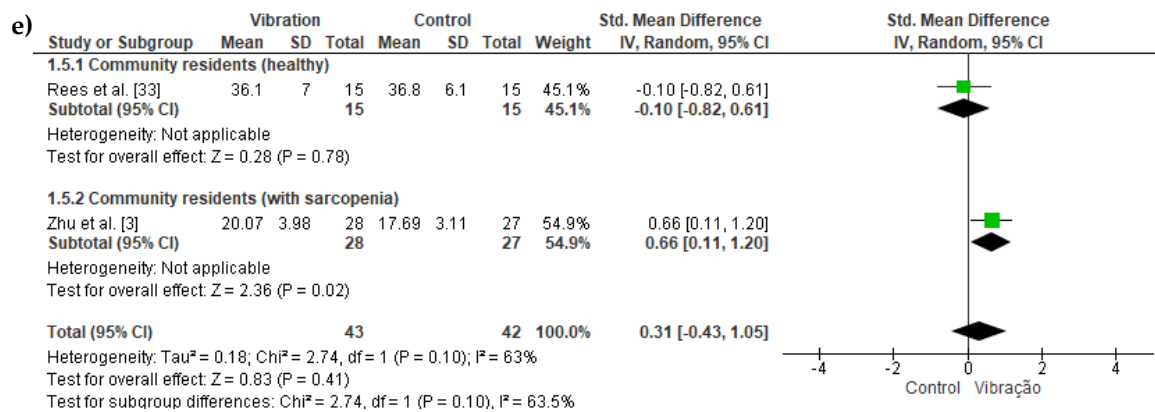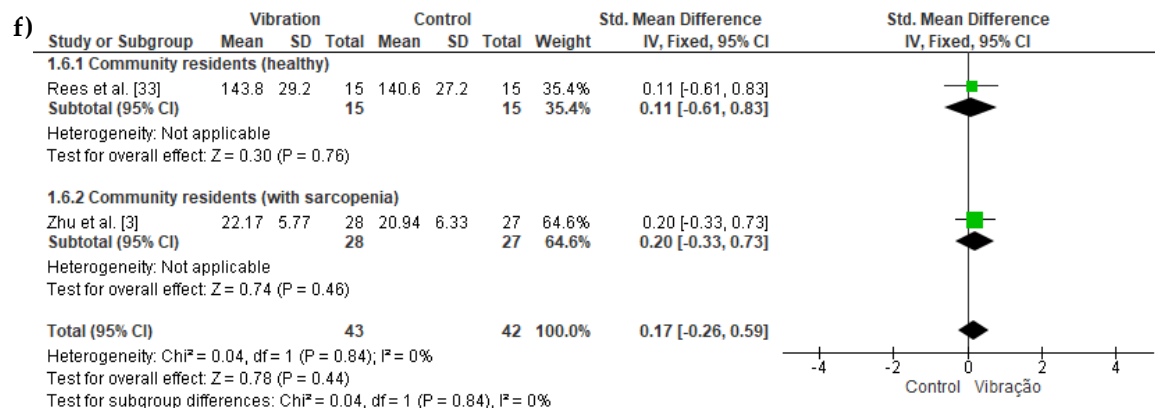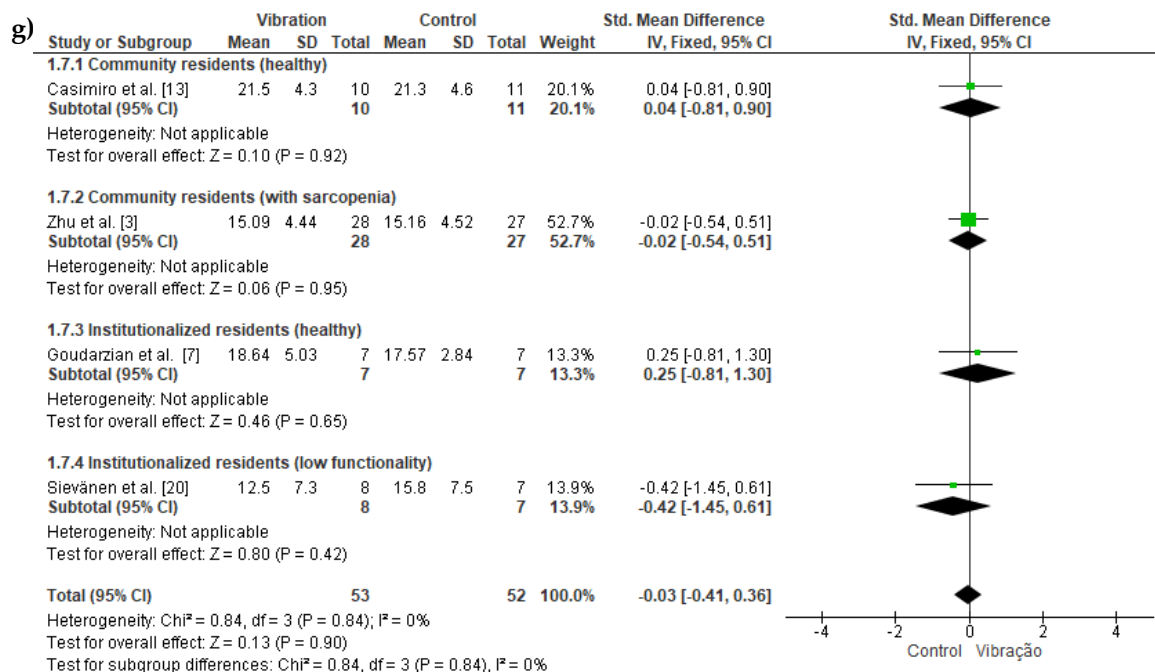

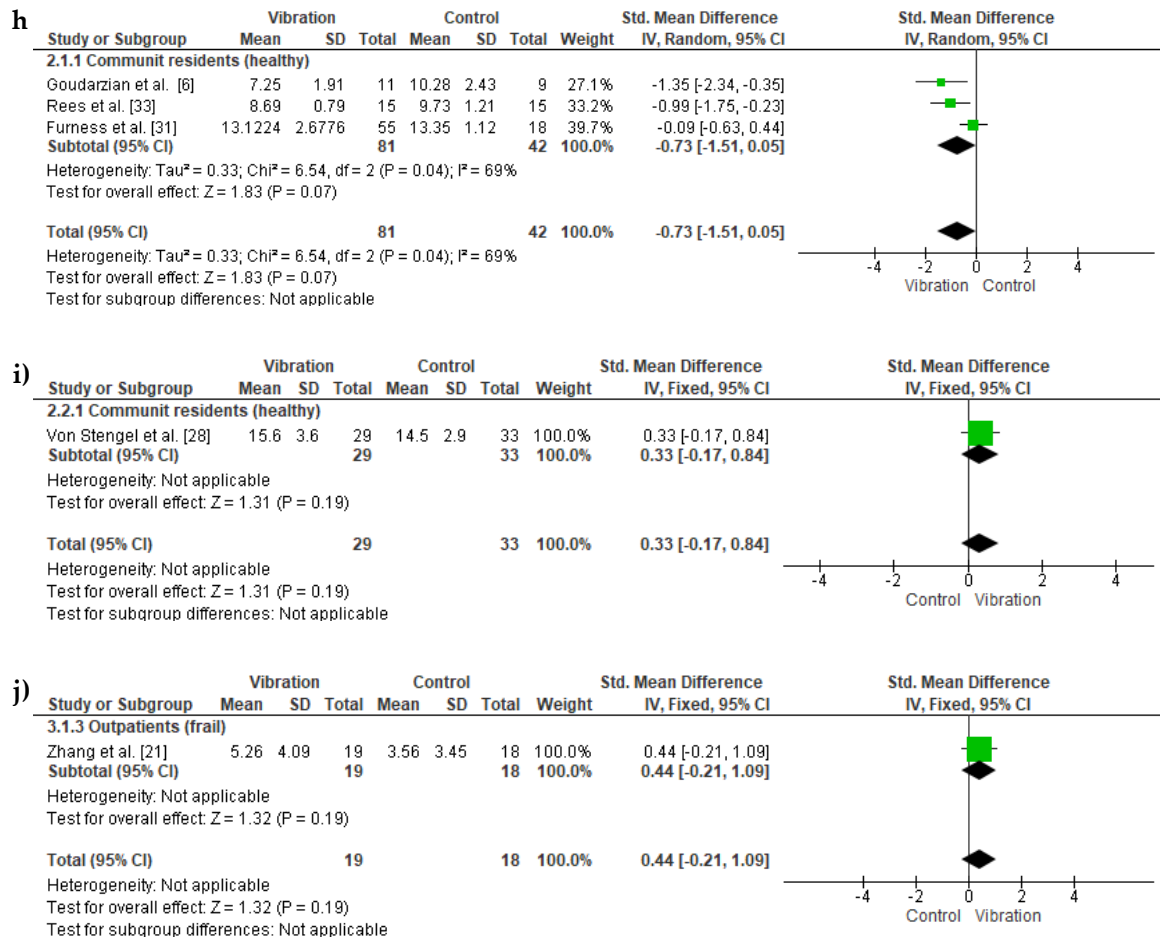

**Supplementary Figure S9.** Analysis comparing the effectiveness of WBV vs. control groups on side-alternating platforms: a) muscle strength of the knee extensors; b) muscle strength of the knee flexors; c) muscular strength of the extensors of the lower limbs; d) muscular strength of ankle plantar flexors; e) muscular strength of the ankle dorsiflexors; f) muscle strength of the hip flexors; g) handgrip muscle strength; h) five-times-sit-to-stand; i) countermovement jump; j) 30-s sit-to-stand.



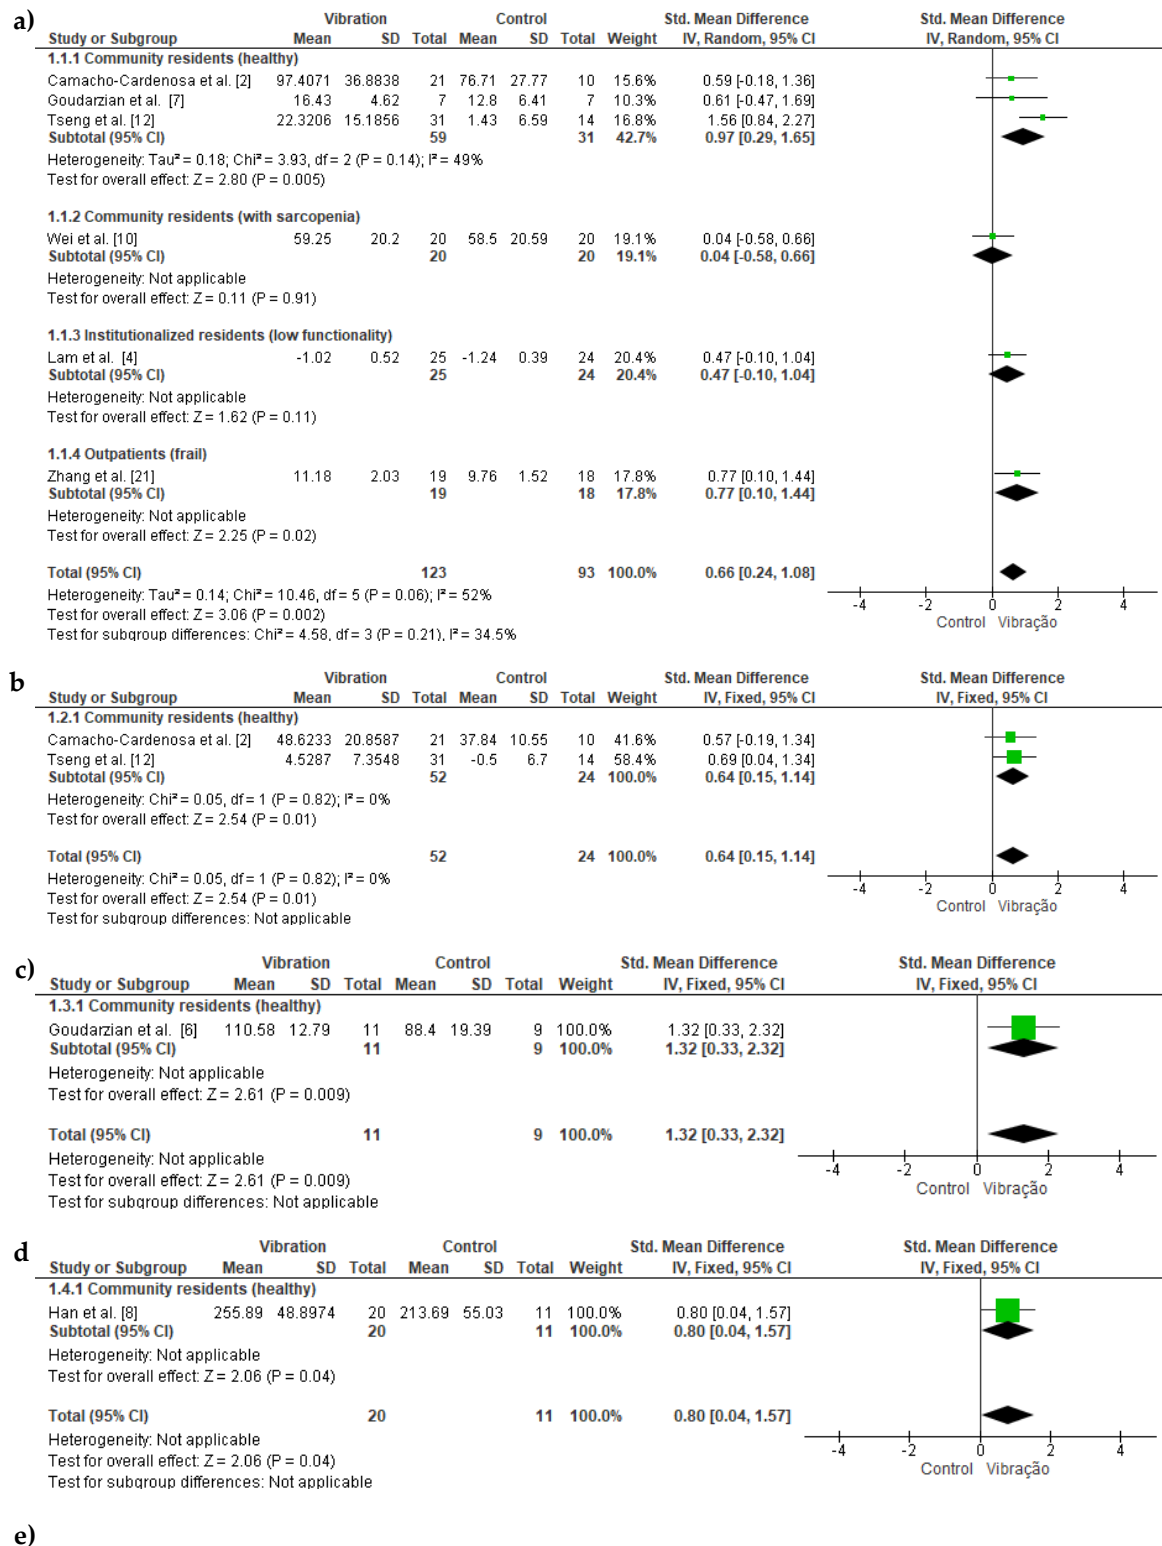

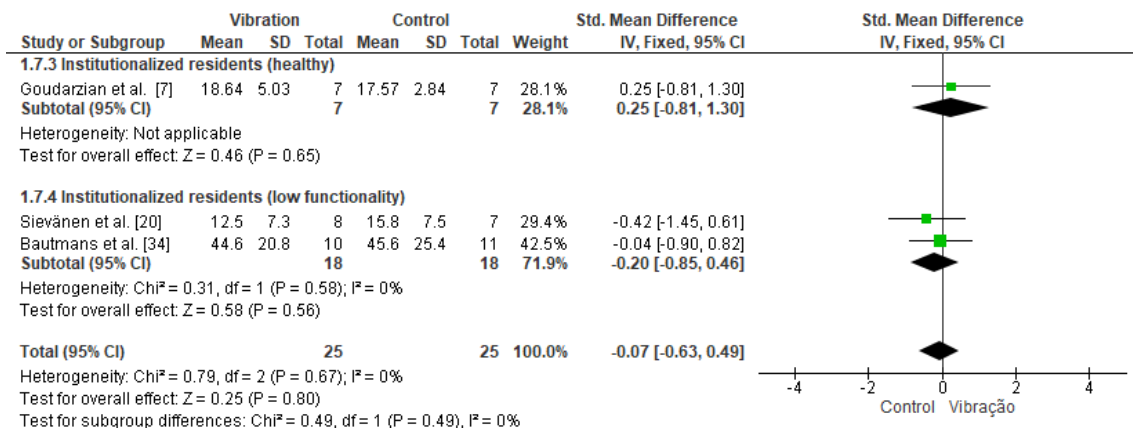

f)

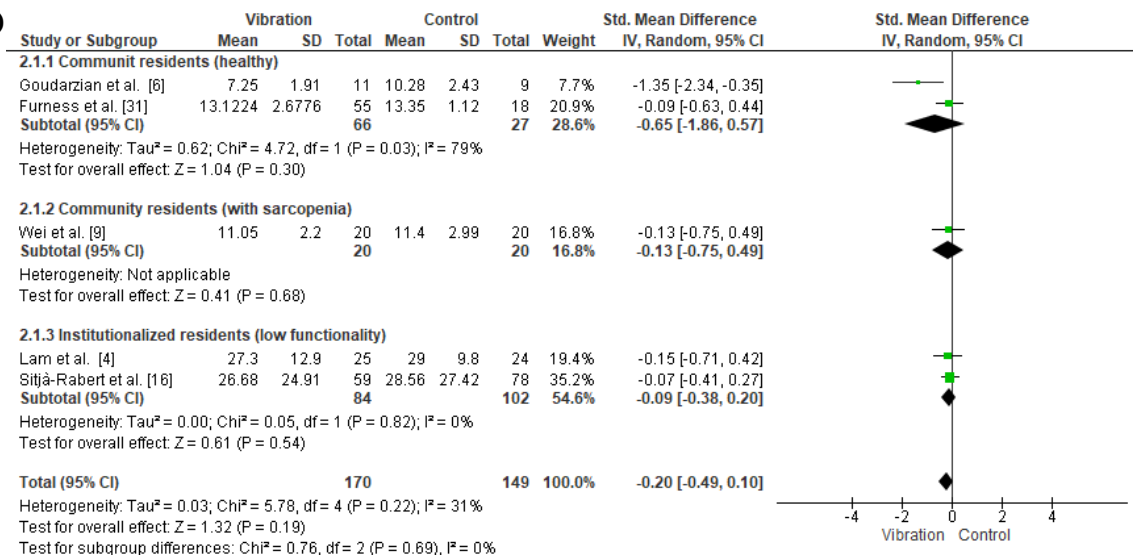

g)

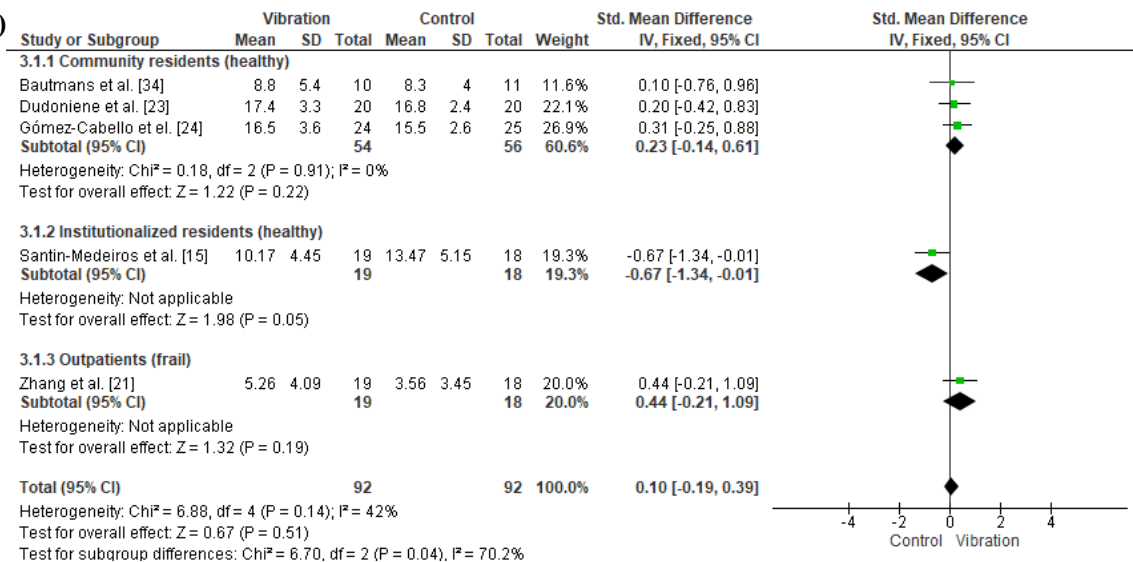

h

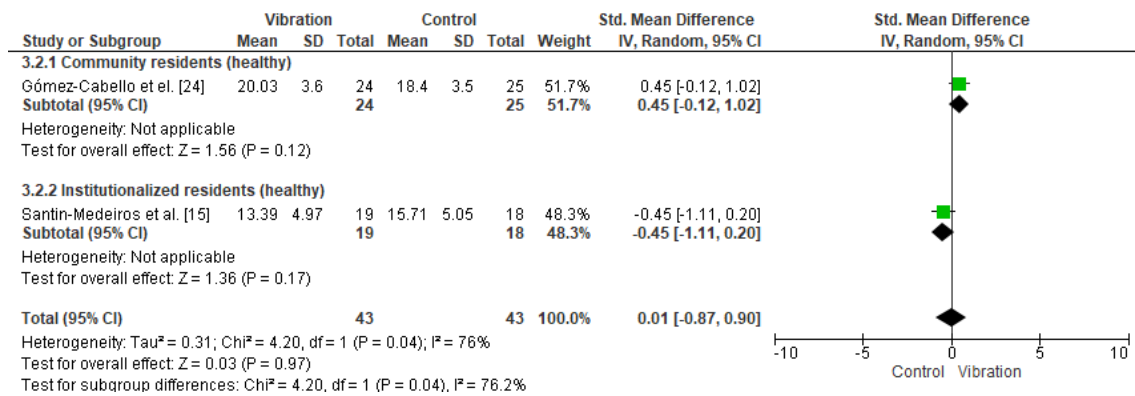

**Supplementary Figure S10.** Analysis comparing the effectiveness of WBV administered at a low cumulative dose ( $\leq 144$  minutes) vs. control groups: a) muscle strength of the knee extensors; b) muscle strength of the knee flexors; c) muscular strength of the extensors of the lower limbs; d) muscular strength of the plantar flexors; e) handgrip muscle strength; f) five-times-sit-to-stand; g) 30-s sit-to-stand; h) 30-s arm curl.

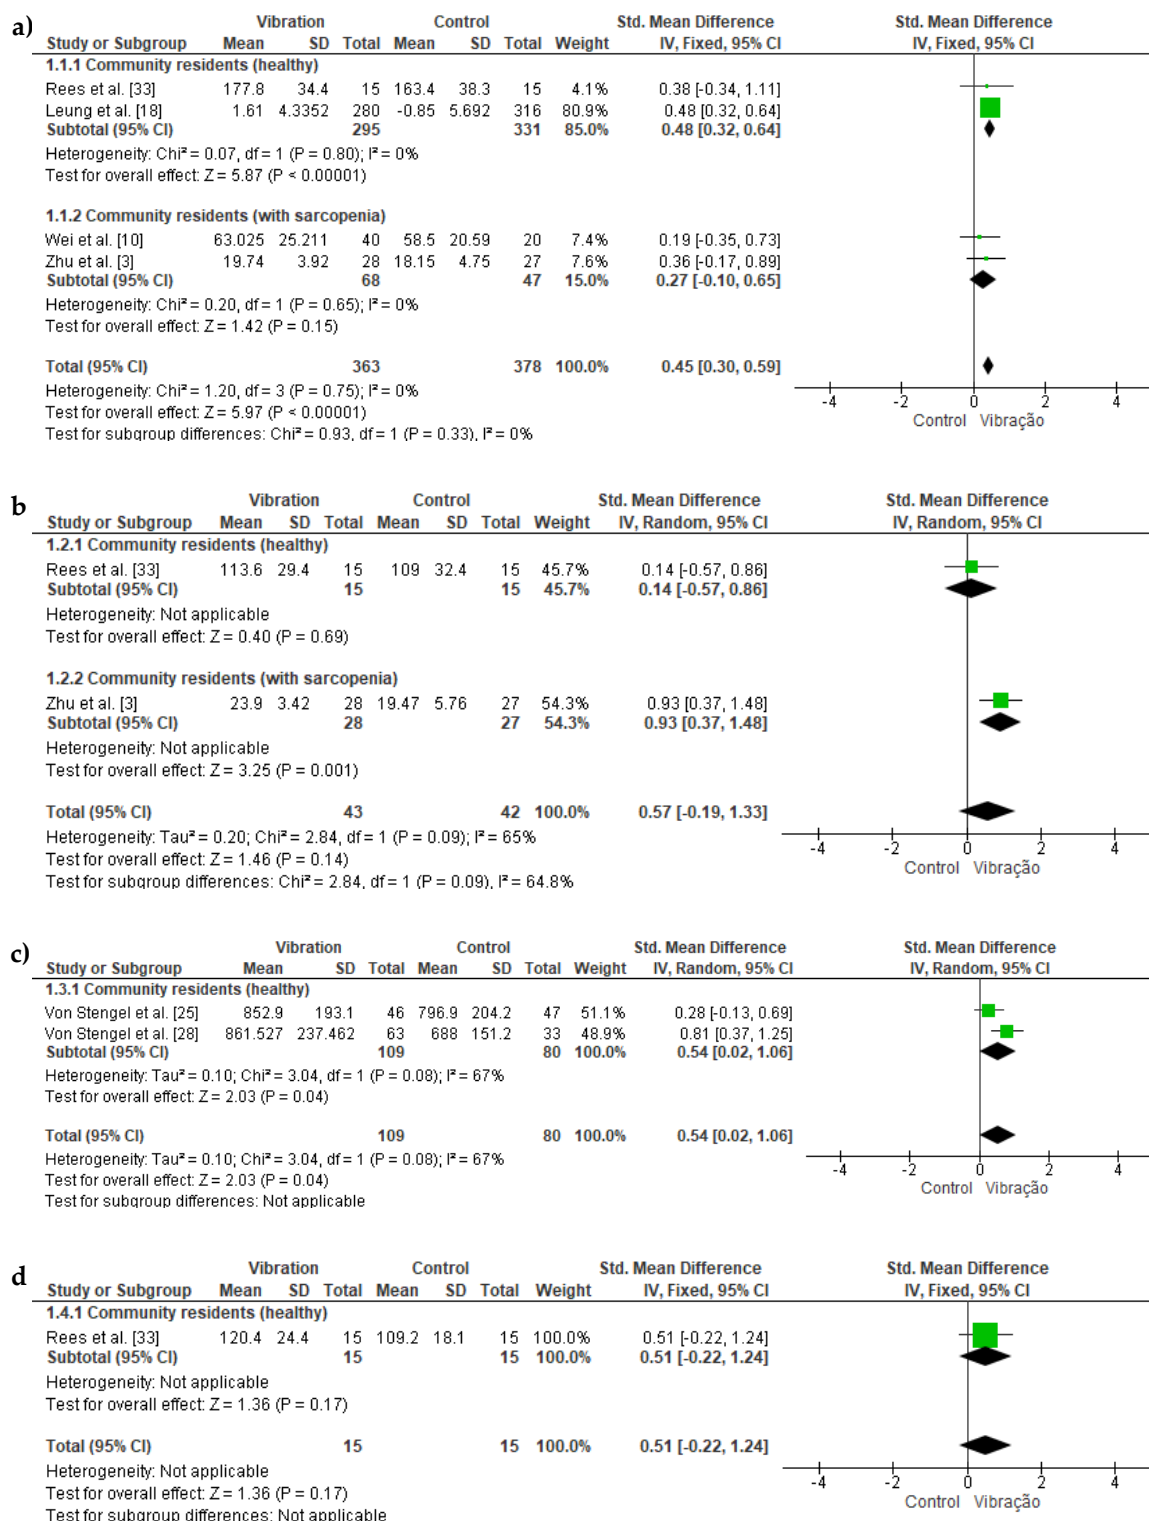

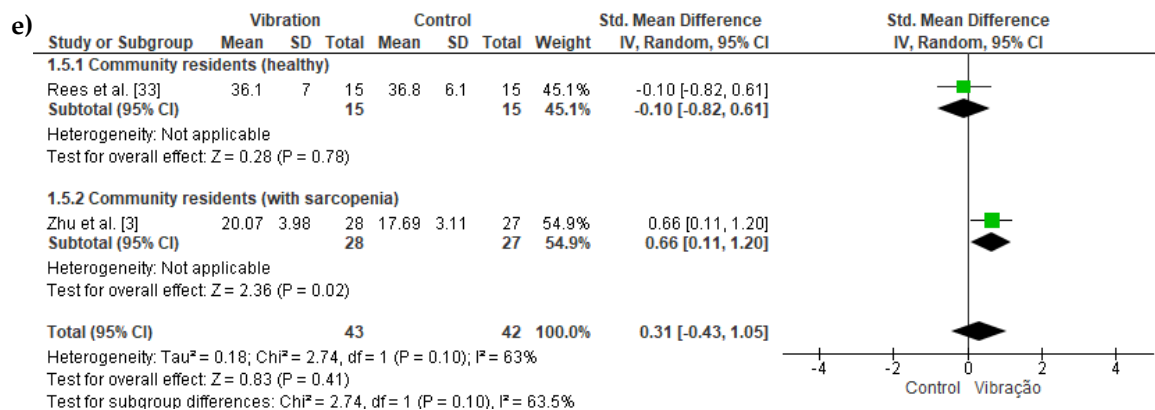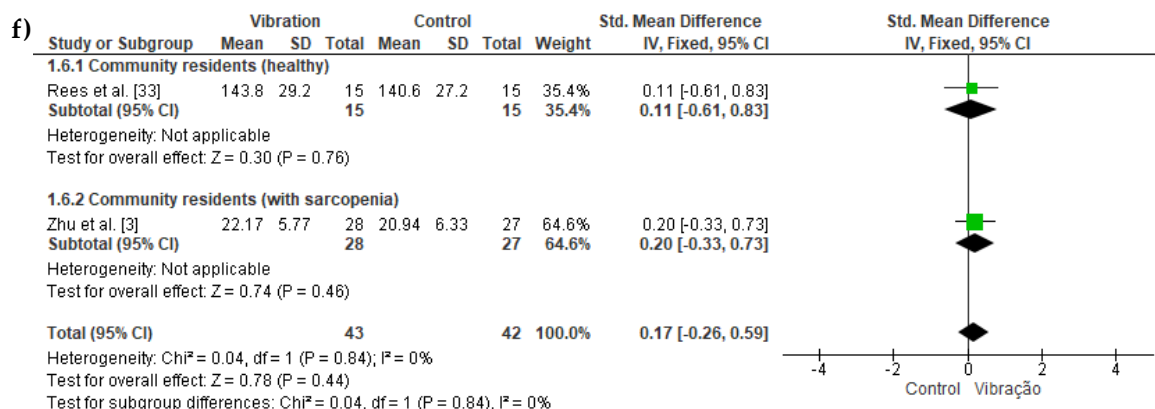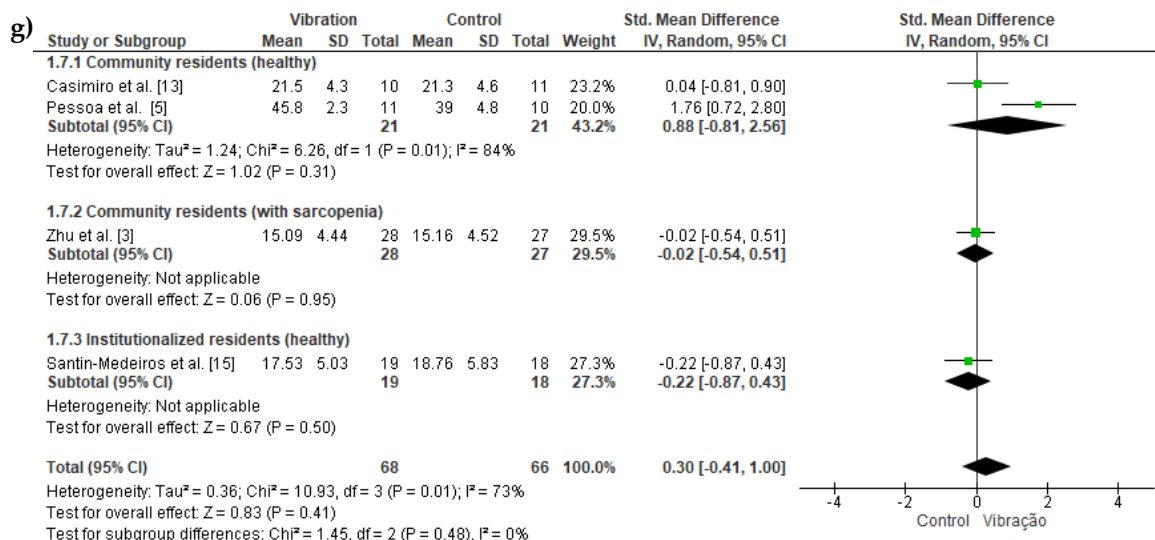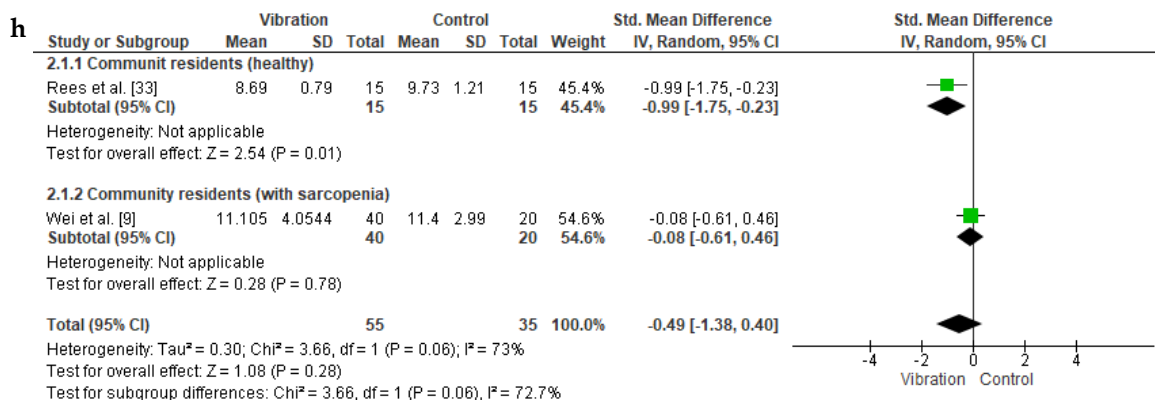

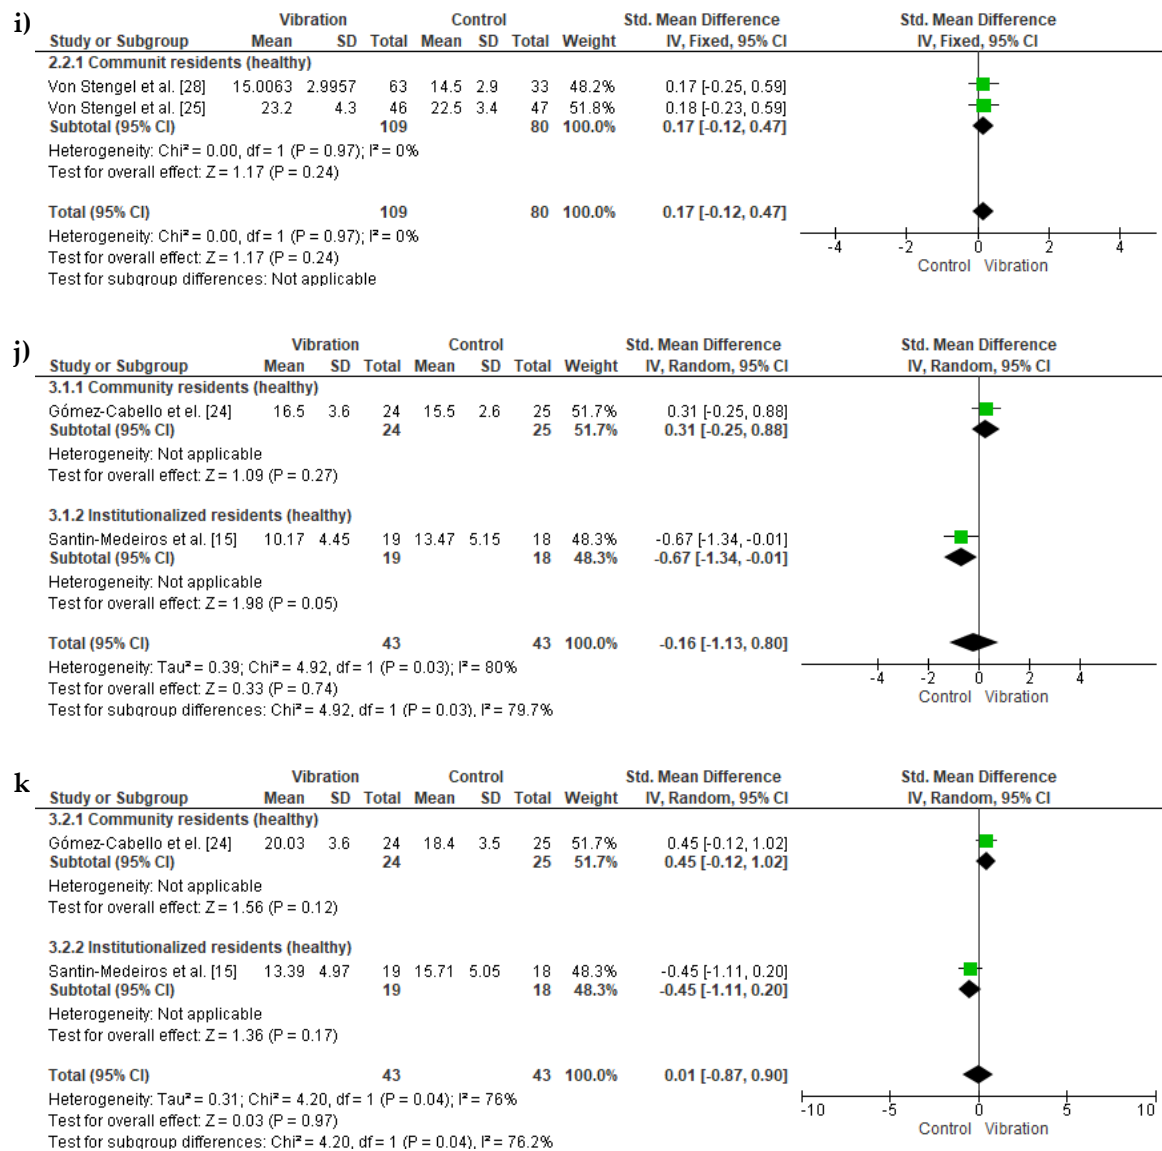

**Supplementary Figure S11.** Analysis comparing the effectiveness of WBV administered at a high cumulative dose (> 144 minutes) vs. control groups: a) muscle strength of the knee extensors; b) muscle strength of the knee flexors; c) muscular strength of the extensors of the lower limbs; d) muscular strength of the plantar flexors; e) muscular strength of the ankle dorsiflexors; f) muscle strength of the hip flexors; g) handgrip muscle strength; h) five-times-sit-to-stand; i) countermovement jump; j) 30-s sit-to-stand; k) 30-s arm curl.

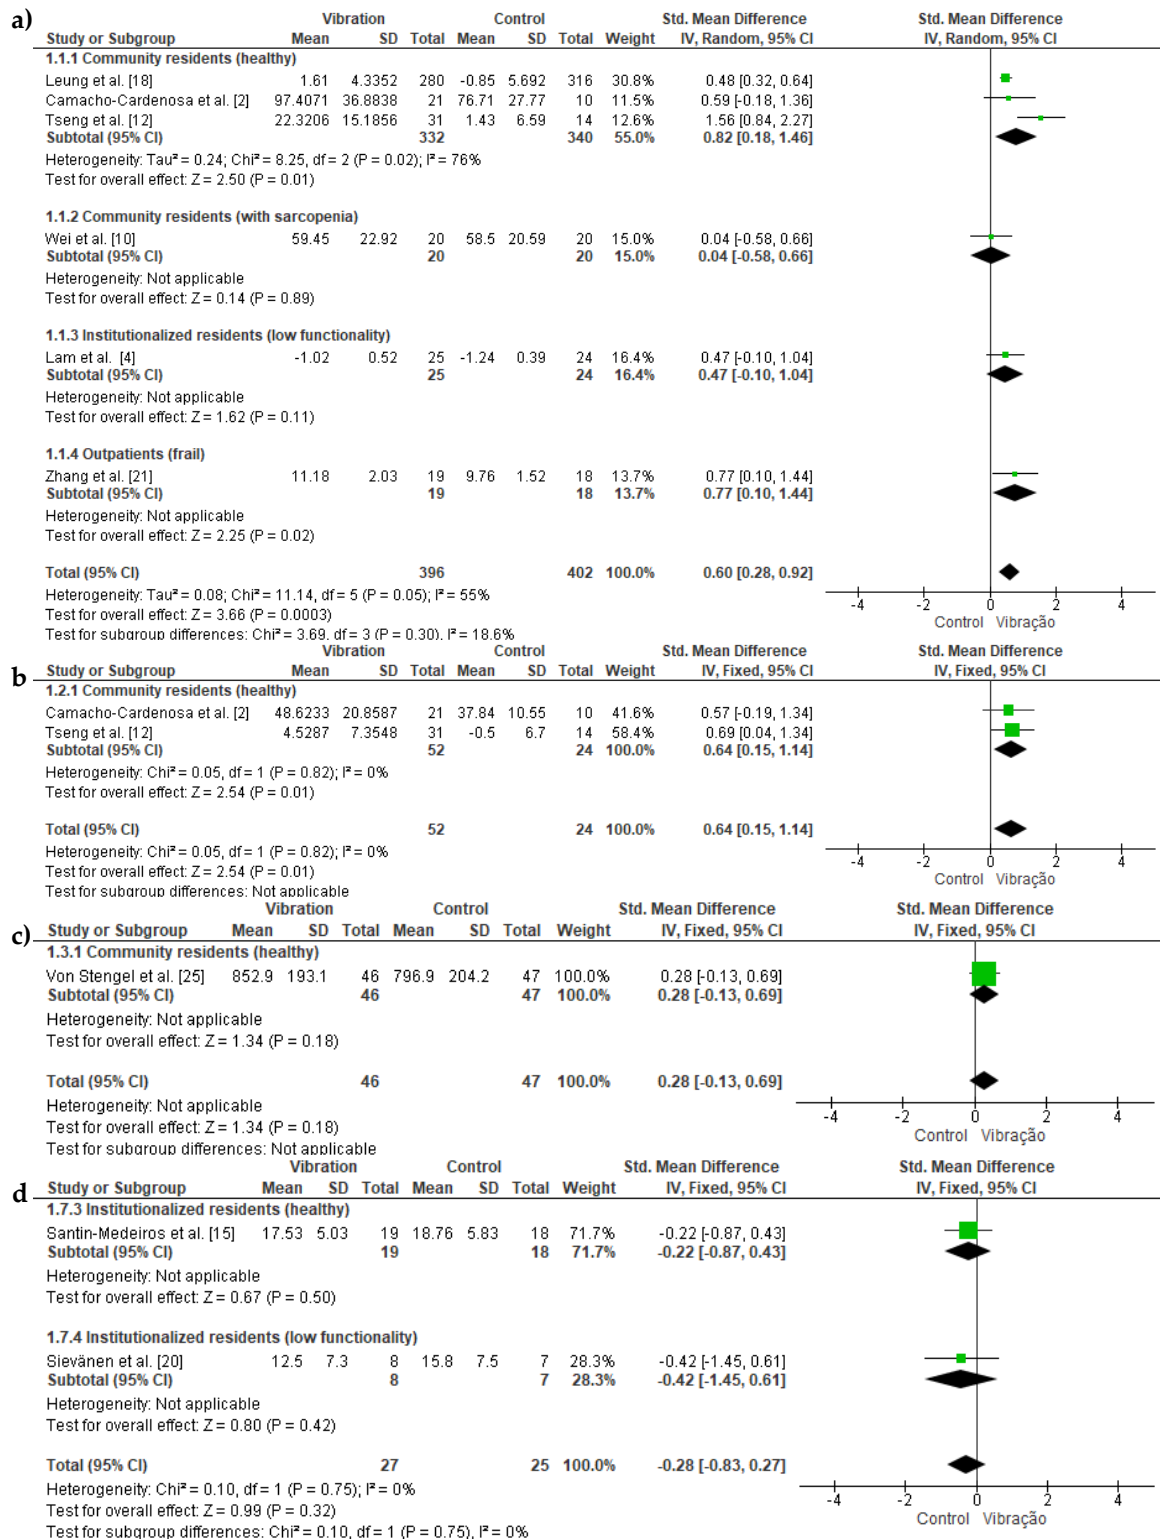

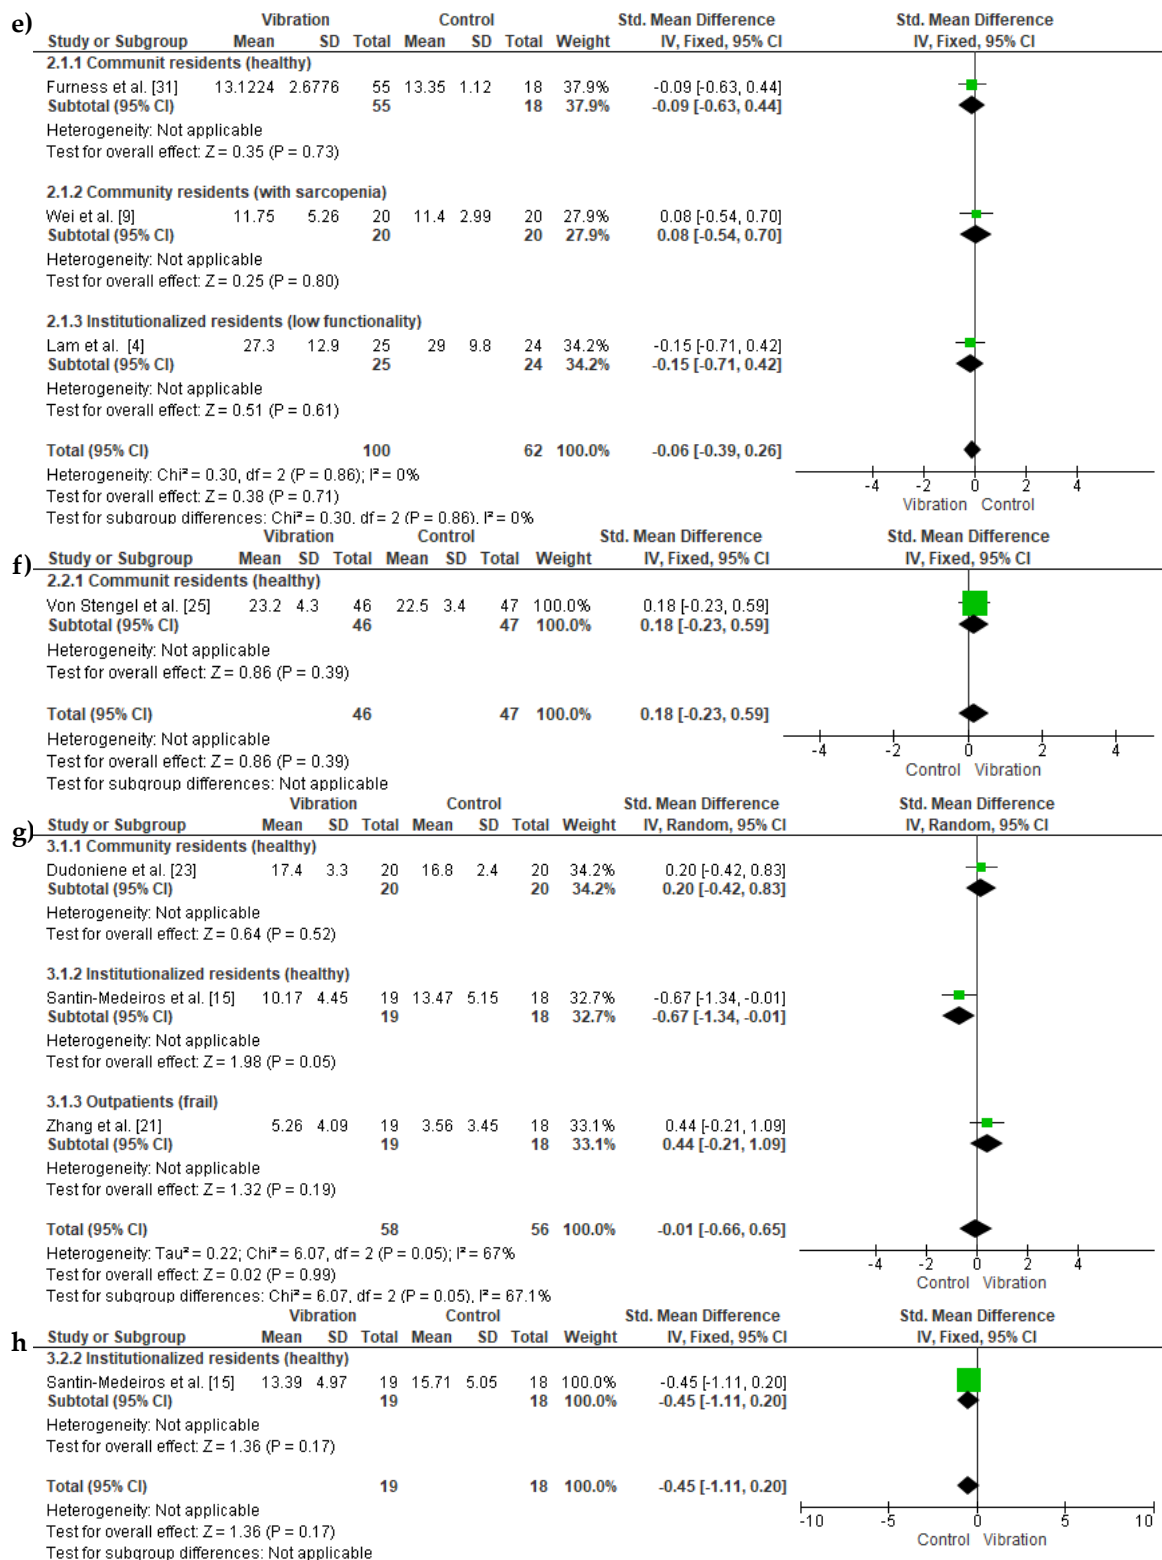

**Supplementary Figure S12.** Analysis comparing the effectiveness of WBV administered at low magnitude ( $\leq 4.4$  g) vs. control groups: a) muscle strength of the knee extensors; b) muscle strength of the knee flexors; c) muscular strength of the extensors of the lower limbs; d) handgrip muscle strength; e) five-times-sit-to-stand; f) countermovement jump; g) 30-s sit-to-stand; h) 30-s arm curl.



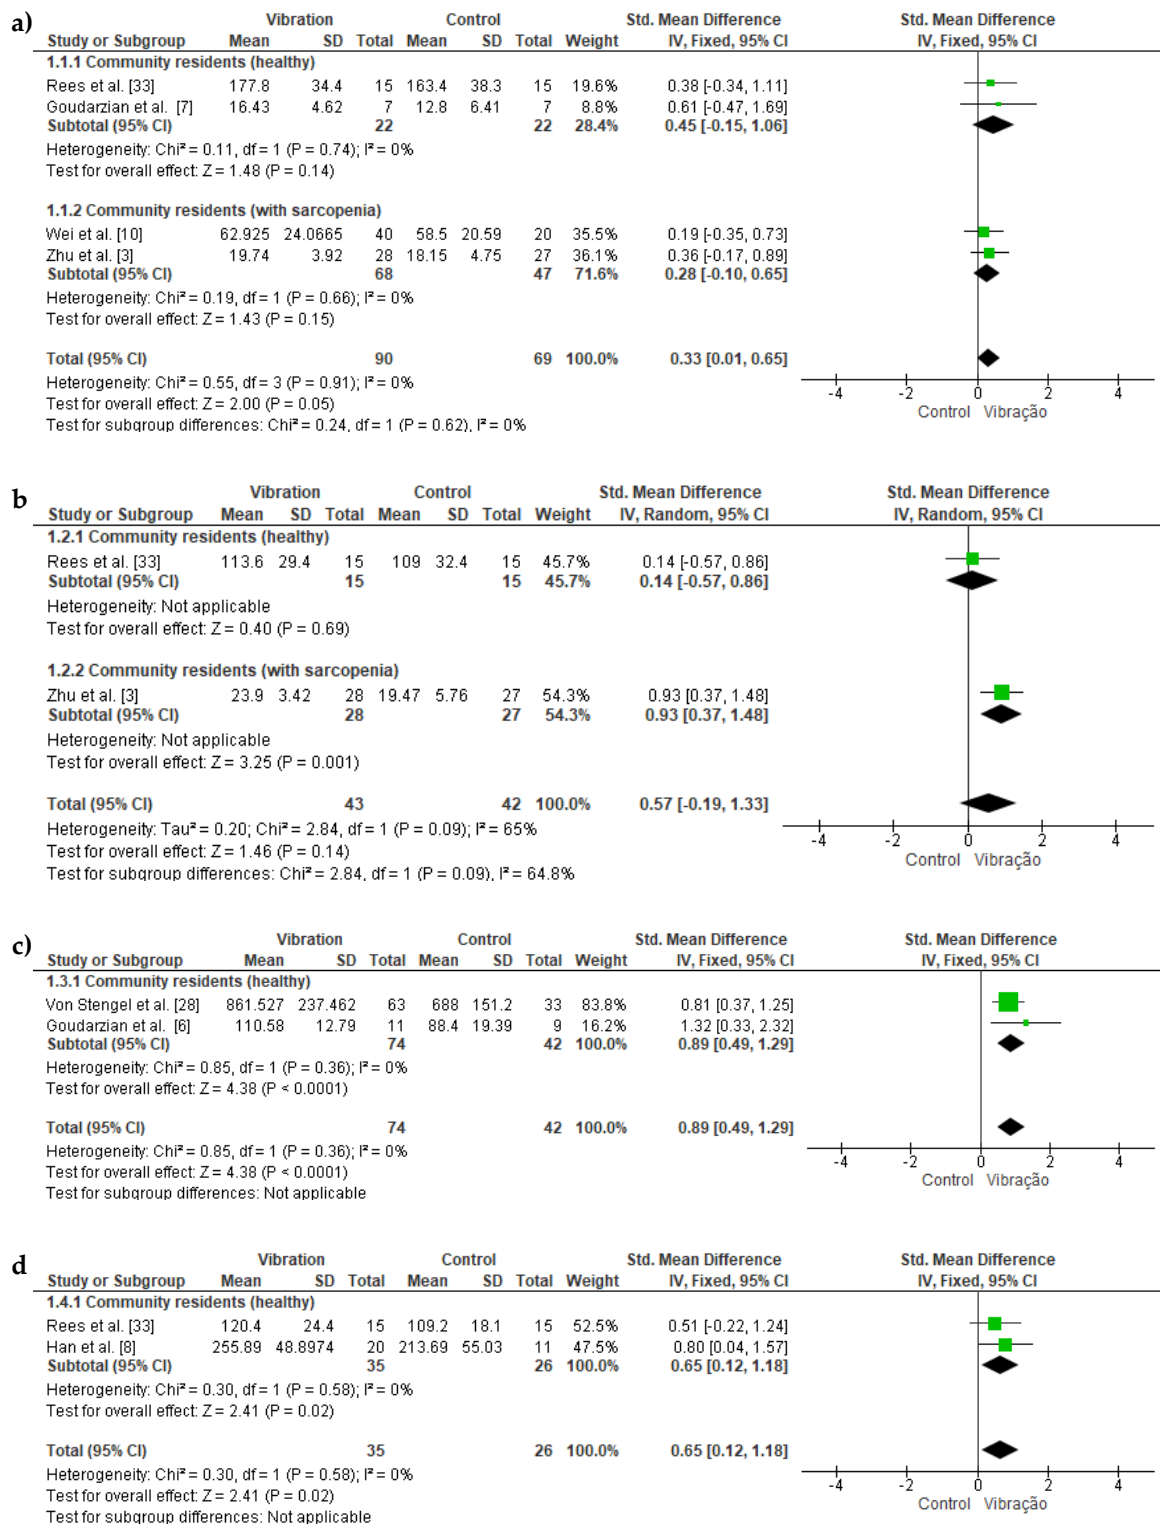

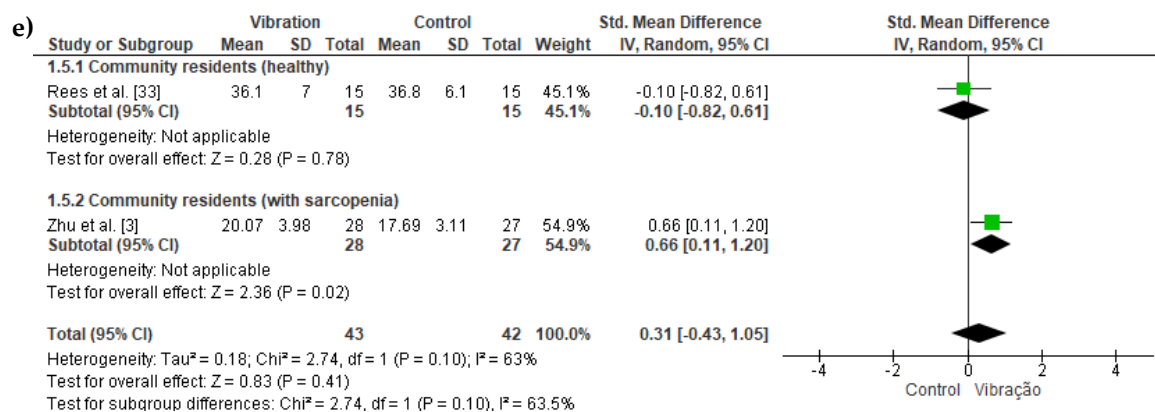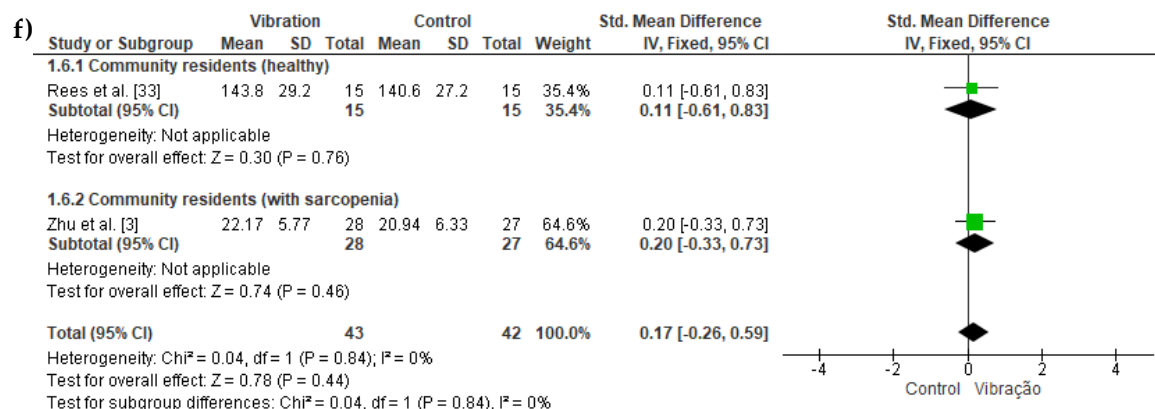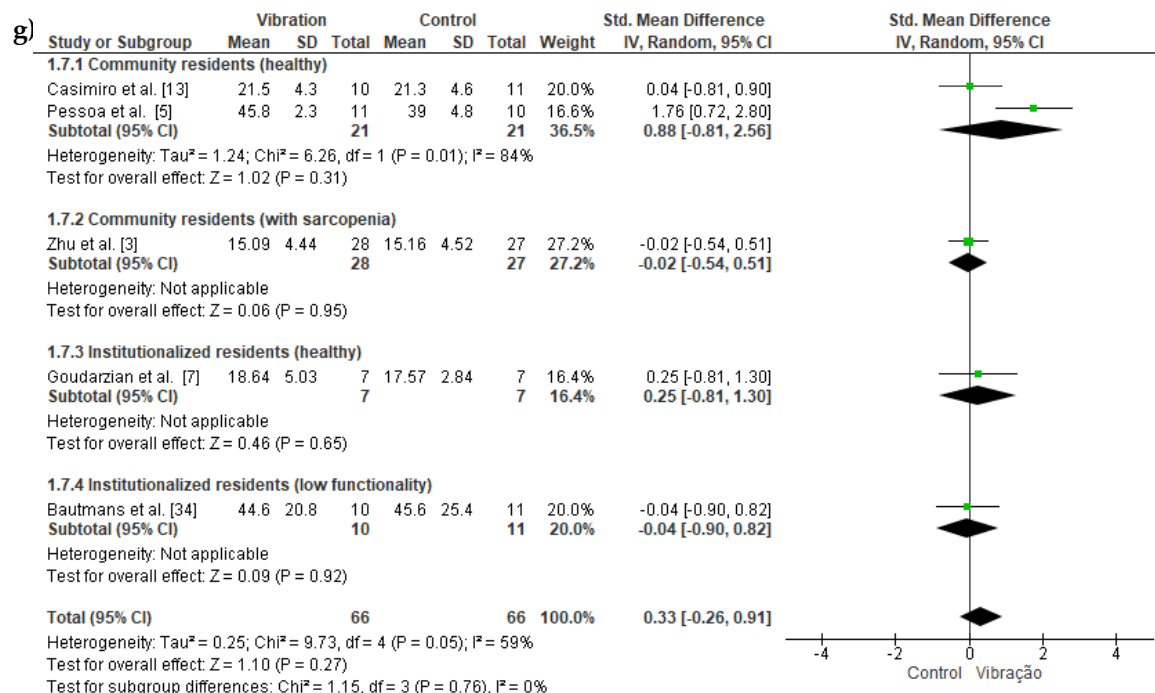

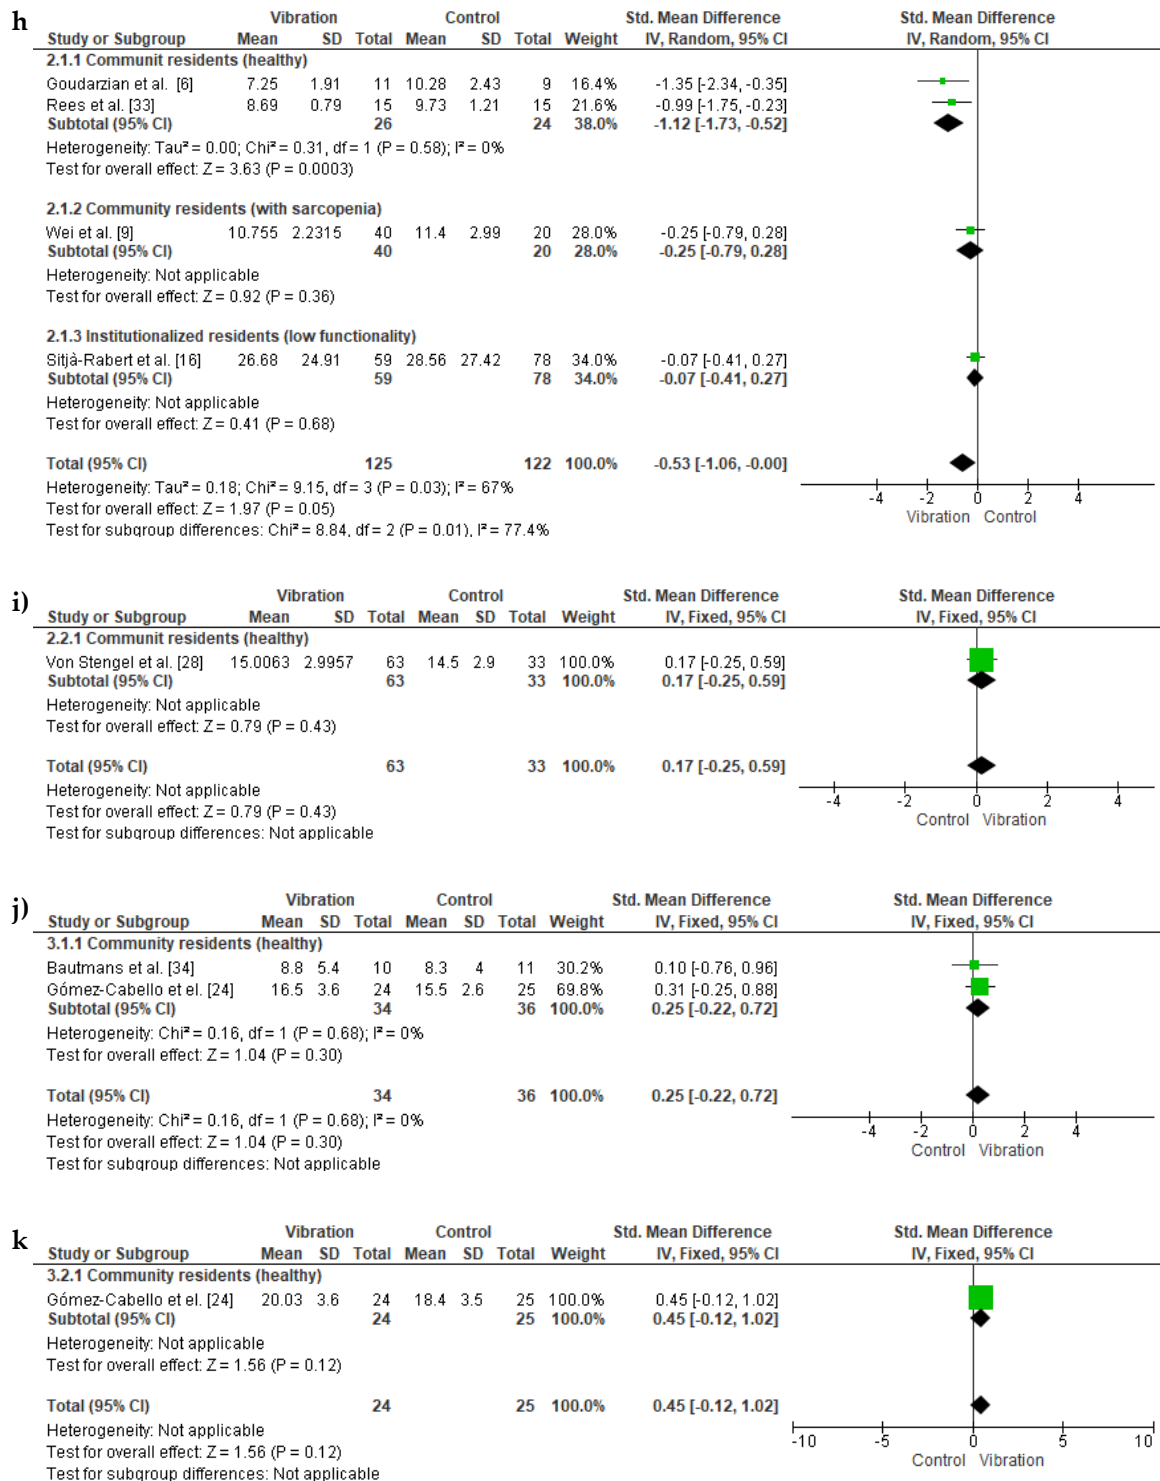

**Supplementary Figure S13.** Analysis comparing the effectiveness of WBV administered at high magnitude (> 4.4 g) vs. control groups: a) muscle strength of the knee extensors; b) muscle strength of the knee flexors; c) muscular strength of the extensors of the lower limbs; d) muscular strength of the plantar flexors; e) muscular strength of the ankle dorsiflexors; f) muscle strength of the hip flexors; g) handgrip muscle strength; h) Five-times-sit-to-stand; i) countermovement jump; j) 30-s sit-to-stand; k) 30-s arm curl.
